# Supplementary material for: Experimental and theoretical studies on extraction behavior of di-n-alkyl phosphine oxides towards actinides
Source: Royal Society of Chemistry journal article supplement (doi:10.1039/c5ra19090h), 2015-01-01
Supplement: c5ra19090h1.pdf [file c5ra19090h1.pdf]

Electronic Supplementary Information

**Experimental and Theoretical Studies on Extraction  
behavior of Di-*n*-Alkyl Phosphine Oxides towards  
Actinides**

*Dhrubajyoti Das*<sup>1</sup>, *E. Veerashekhhar Goud*<sup>1</sup>, *Suresh Annam*<sup>1</sup>, *S. Jayalakshmi*<sup>2</sup>,  
*Gopinadhanpillai Gopakumar*<sup>2</sup>, *C.V.S. Brahmmananda Rao*<sup>2</sup>, *N. Sivaraman*<sup>2</sup>,  
*Akella Sivaramakrishna*<sup>1,\*</sup> and *Kari Vijayakrishna*<sup>1,\*</sup>

<sup>1</sup> Organic Chemistry Division, School of Advanced Sciences, VIT University, Vellore-632014,  
Tamil Nadu, India.

<sup>2</sup> Chemistry Group, Indira Gandhi Centre for Atomic Research (IGCAR), Kalpakkam 603102,  
Tamil Nadu, India.

---

Corresponding Author: Dr. Kari Vijayakrishna  
Address: Organic Chemistry Division,  
School of Advanced Sciences,  
VIT University, Vellore 632014, Tamil Nadu, India.  
Phone: +91 416 224 2334.  
Fax: +91 416224 3092.  
E-mail: [kari@vit.ac.in](mailto:kari@vit.ac.in)

Corresponding Author: Dr. Akella Sivaramakrishna  
Address: Organic Chemistry Division,  
School of Advanced Sciences,  
VIT University, Vellore 632014, Tamil Nadu, India.  
Phone: +91 416 224 2351.  
Fax: +91 416224 3092.  
E-mail: [asrkrishna@vit.ac.in](mailto:asrkrishna@vit.ac.in)

**2.2.1. Di-n-hexyl phosphine oxide (DHePO):** 7.8 g (326.09 mmol) of Mg, 53.8 g (326.09 mmol) of 1-bromohexane and 15 g (108.69 mmol) of diethyl phosphite. Product: 19.6g, Yield: 82%, M.P: 75-77°C, **IR** (cm<sup>-1</sup>): (P=O) 1161.15. **<sup>1</sup>H NMR** (δ, 400 MHz, CDCl<sub>3</sub>): 0.89-0.92 (t, CH<sub>3</sub>CH<sub>2</sub>, 6 H), 1.81-1.88 (m, P-CH<sub>2</sub>, 4 H), 1.32-1.79 (m, CH<sub>3</sub>CH<sub>2</sub>, 16 H), 6.8 (d, <sup>1</sup>J<sub>P-H</sub>: 448.8 Hz, 1 H). **<sup>31</sup>P{<sup>1</sup>H}-NMR** (δ, 400 MHz, CDCl<sub>3</sub>): 36.14 (d, <sup>1</sup>J<sub>P-H</sub>: 458.46 Hz) . **<sup>13</sup>C-NMR** (δ, 100 MHz, CDCl<sub>3</sub>): 31.30, 30.43, 28.24 (d), 22.38, 21.74 (d), 13.98. **Mass (EI, M/Z):** 218.2

**2.2.2. Di-n-heptyl phosphine oxide (DHpPO):** 7.8 g (326.09 mmol) of Mg, 58.37 g (326.09 mmol) of 1-bromoheptane and 15 g (108.69 mmol) of diethyl phosphite. Product: 23.43 g, Yield: 88%, M.P: 83-85°C, **IR** (cm<sup>-1</sup>): (P=O) 1157.29. **<sup>1</sup>H-NMR** (δ, 400 MHz, CDCl<sub>3</sub>): 0.82-0.86 (t, CH<sub>3</sub>CH<sub>2</sub>, 6 H), 1.78 (m, P-CH<sub>2</sub>, 4 H), 1.24-1.68 (m, CH<sub>3</sub>CH<sub>2</sub>, 20 H), 6.86 (d, <sup>1</sup>J<sub>P-H</sub>: 446 Hz, 1 H). **<sup>31</sup>P{<sup>1</sup>H}-NMR** (δ, 162 MHz, CDCl<sub>3</sub>): 35.69 (d, <sup>1</sup>J<sub>P-H</sub>: 443.88 Hz). **<sup>13</sup>C-NMR** (δ, 100 MHz, CDCl<sub>3</sub>): 31.52, 30.70, 30.57, 28.77, 22.55, 21.78, 14.07. **Mass (EI, M/Z):** 245.27

**2.2.3. Di-n-octyl phosphine oxide (DOPO):** M.P: 84-86 °C, **IR** (cm<sup>-1</sup>): (P=O) 1159.22. **<sup>1</sup>H-NMR** (δ, 400 MHz, CDCl<sub>3</sub>): 0.86-0.89 (t, CH<sub>3</sub>CH<sub>2</sub>, 6 H), 1.85-1.9 (m, P-CH<sub>2</sub>, 4 H), 1.26-1.62 (m, CH<sub>3</sub>CH<sub>2</sub>, 24 H), 6.91 (d, <sup>1</sup>J<sub>P-H</sub>: 445 Hz, 1 H). **<sup>31</sup>P{<sup>1</sup>H}-NMR** (δ, 162 MHz, CDCl<sub>3</sub>): 35.03 (d, <sup>1</sup>J<sub>P-H</sub>: 447.12 Hz). **<sup>13</sup>C-NMR** (δ, 100 MHz, CDCl<sub>3</sub>): 31.77, 30.63 (d), 29.01 (d), 27.95(d), 21.61, 21.76(d), 14.07. **Mass (EI, M/Z):** 274.5

**2.2.4. Di-n-decyl phosphine oxide (DDPO):** 7.8 g (326.09 mmol) of Mg, 72 g (326.09 mmol) of 1-bromodecane and 15 g (108.69 mmol) of diethyl phosphite. Product: 28.22 g, Yield: 79%, M.P: 95-97°C **IR** (cm<sup>-1</sup>): (P=O) 1155.36. **<sup>1</sup>H-NMR** (δ, 400 MHz, CDCl<sub>3</sub>): 0.85-0.88 (t, CH<sub>3</sub>CH<sub>2</sub>, 6H), 1.74-1.95 (m, P-CH<sub>2</sub>, 4H), 1.24-1.63 (m, CH<sub>3</sub>CH<sub>2</sub>, 32H), 6.83 (d, <sup>1</sup>J<sub>P-H</sub>: 444 Hz, 1 H). **<sup>31</sup>P{<sup>1</sup>H}-NMR** (δ, 162 MHz, CDCl<sub>3</sub>): 35.03 (d, <sup>1</sup>J<sub>P-H</sub>: 445.5 Hz). **<sup>13</sup>C-NMR** (δ, 100 MHz,

CDCl<sub>3</sub>):31.87, 30.77 (d), 29.52, 29.31 (d), 29.13, 28.25(d), 22.67, 21.76, 14.1. **Mass (EI, M/Z):**  
329.4

**2.3.2. [Th(NO<sub>3</sub>)<sub>4</sub>(DHpPO)<sub>2</sub>] (2):** [Th(NO<sub>3</sub>)<sub>4</sub>.5H<sub>2</sub>O (0.2 g, 0.35 mmol) and DHpPO (0.172 g, 0.7 mmol)], Product: 0.33 g (low melting solid), Yield: 87.1%, **IR** (cm<sup>-1</sup>): (P=O) 1078.21, **<sup>31</sup>P{<sup>1</sup>H}-NMR** (δ, 162 MHz, CDCl<sub>3</sub>): 49.2 (d, <sup>1</sup>J<sub>P-H</sub>: 479.52 Hz). **<sup>1</sup>H-NMR** (δ, 400 MHz, CDCl<sub>3</sub>): 0.860.89 (t, CH<sub>3</sub>CH<sub>2</sub>, 6 H), 1.98 (m, P-CH<sub>2</sub>, 4 H), 1.28-1.6 (m, CH<sub>3</sub>CH<sub>2</sub>, 20 H), 6.93 (d, <sup>1</sup>J<sub>P-H</sub>: 484 Hz, 1 H).

**2.3.3. [Th(NO<sub>3</sub>)<sub>4</sub>(DOPO)<sub>2</sub>] (3):** [Th(NO<sub>3</sub>)<sub>4</sub>.5H<sub>2</sub>O (0.2 g, 0.35 mmol) and DOPO (0.193 g, 0.7 mmol)], Product: 0.32 g (low melting solid), Yield: 81.2%, **IR** (cm<sup>-1</sup>): (P=O) 1085.92, **<sup>31</sup>P{<sup>1</sup>H}-NMR**(δ, 162 MHz, CDCl<sub>3</sub>): 49.73 (d, <sup>1</sup>J<sub>P-H</sub>: 502 Hz), **<sup>1</sup>H-NMR** (δ, 400 MHz, CDCl<sub>3</sub>): 0.86-0.89 (t, CH<sub>3</sub>CH<sub>2</sub>, 6 H), 1.93 (m, P-CH<sub>2</sub>, 4 H), 1.27-1.56 (m, CH<sub>3</sub>CH<sub>2</sub>, 24 H), 6.94 (d, <sup>1</sup>J<sub>P-H</sub>: 484 Hz, 1 H).

**2.3.4. [Th(NO<sub>3</sub>)<sub>4</sub>(DDPO)<sub>2</sub>] (4):** [Th(NO<sub>3</sub>)<sub>4</sub>.5H<sub>2</sub>O (0.2 g, 0.35 mmol) and DDPO (0.231 g, 0.7 mmol)], Product: 0.37 g (low melting solid), Yield: 84.7%, **IR** (cm<sup>-1</sup>): (P=O) 1083.99, **<sup>31</sup>P{<sup>1</sup>H}-NMR** (δ, 162 MHz, CDCl<sub>3</sub>): 49.05 (d, <sup>1</sup>J<sub>P-H</sub>: 490.86 Hz). **<sup>1</sup>H-NMR** (δ, 400 MHz, CDCl<sub>3</sub>): δ = 0.85-0.89 (t, CH<sub>3</sub>CH<sub>2</sub>, 6 H), 1.97 (m, P-CH<sub>2</sub>, 4 H), 1.25-1.57 (m, CH<sub>3</sub>CH<sub>2</sub>, 32 H), 6.94 (d, <sup>1</sup>J<sub>P-H</sub>: 484 Hz, 1 H).

**2.3.5. [LaCl<sub>3</sub>(DHePO)<sub>3</sub>] (5):**[LaCl<sub>3</sub>.7H<sub>2</sub>O (0.2 g, 0.54 mmol) and DHePO (0.35 g, 1.62 mmol)], Product: 0.49 g, Yield: 88%, M.P: 65-67°C, **IR** (cm<sup>-1</sup>): (P=O) 1145.72, **<sup>31</sup>P{<sup>1</sup>H}-NMR** (δ, 162 MHz, CDCl<sub>3</sub>): 36.93 (d, <sup>1</sup>J<sub>P-H</sub>: 455.22 Hz). **<sup>1</sup>H-NMR** (δ, 400 MHz, CDCl<sub>3</sub>): δ = 0.86-0.89 (t, CH<sub>3</sub>CH<sub>2</sub>, 6 H), 1.9 (m, P-CH<sub>2</sub>, 4 H), 1.27-1.63 (m, CH<sub>3</sub>CH<sub>2</sub>, 16 H), 6.9 (d, <sup>1</sup>J<sub>P-H</sub>: 452 Hz, 1 H).

**2.3.6. [LaCl<sub>3</sub>(DHpPO)<sub>3</sub>] (6):** [LaCl<sub>3</sub>·7H<sub>2</sub>O (0.2 g, 0.54 mmol) and DHpPO (0.39 g, 1.62 mmol)], Product: 0.51 g, Yield: 84.6%, M.P: 70-72°C, **IR** (cm<sup>-1</sup>): (P=O) 1138.00, **<sup>31</sup>P{<sup>1</sup>H}-NMR** (δ, 162 MHz, CDCl<sub>3</sub>, 25°C): 38.56 (d, <sup>1</sup>J<sub>P-H</sub>: 461.7 Hz). **<sup>1</sup>H-NMR** (δ, 400 MHz, CDCl<sub>3</sub>): 0.85-0.88 (t, **CH<sub>3</sub>CH<sub>2</sub>**, 6 H), 1.96 (m, **P-CH<sub>2</sub>**, 4 H), 1.26-1.59 (m, **CH<sub>3</sub>CH<sub>2</sub>**, 20 H), 6.95 (d, <sup>1</sup>J<sub>P-H</sub>: 460 Hz, 1 H).

**2.3.7. [LaCl<sub>3</sub>(DOPO)<sub>3</sub>] (7):** [LaCl<sub>3</sub>·7H<sub>2</sub>O (0.2 g, 0.54 mmol) and DOPO (0.45 g, 1.62 mmol)], Product: 0.55 g, Yield: 85%, M.P: 70-72°C, **IR** (cm<sup>-1</sup>): (P=O) 1139.93. **<sup>31</sup>P{<sup>1</sup>H}-NMR** (δ, 162 MHz, CDCl<sub>3</sub>): 37.6 (d, <sup>1</sup>J<sub>P-H</sub>: 455 Hz). **<sup>1</sup>H-NMR** (δ, 400 MHz, CDCl<sub>3</sub>): δ = 0.84-0.87 (t, **CH<sub>3</sub>CH<sub>2</sub>**, 6 H), 2.07 (m, **P-CH<sub>2</sub>**, 4 H), 1.21-1.64 (m, **CH<sub>3</sub>CH<sub>2</sub>**, 32 H), 7.01 (d, <sup>1</sup>J<sub>P-H</sub>: 472 Hz, 1 H).

**2.3.8. [LaCl<sub>3</sub>(DDPO)<sub>3</sub>] (8) :** [LaCl<sub>3</sub>·7H<sub>2</sub>O (0.2 g, 0.54 mmol) and DDPO (0.54 g, 1.62 mmol)], Product: 0.63 g, Yield: 86%, M.P: 83-84°C, **IR**(cm<sup>-1</sup>): (P=O) 1153.43, **<sup>31</sup>P{<sup>1</sup>H}-NMR** (δ, 162 MHz, CDCl<sub>3</sub>): 40.54 (d, <sup>1</sup>J<sub>P-H</sub>: 469.8 Hz), **<sup>1</sup>H-NMR** (δ, 400 MHz, CDCl<sub>3</sub>): 0.85-0.88 (t, **CH<sub>3</sub>CH<sub>2</sub>**, 6 H), 1.91 (m, **P-CH<sub>2</sub>**, 4 H), 1.39-1.61 (m, **CH<sub>3</sub>CH<sub>2</sub>**, 32 H), 6.9 (d, <sup>1</sup>J<sub>P-H</sub>: 456 Hz, 1 H).

RK-G-HPO

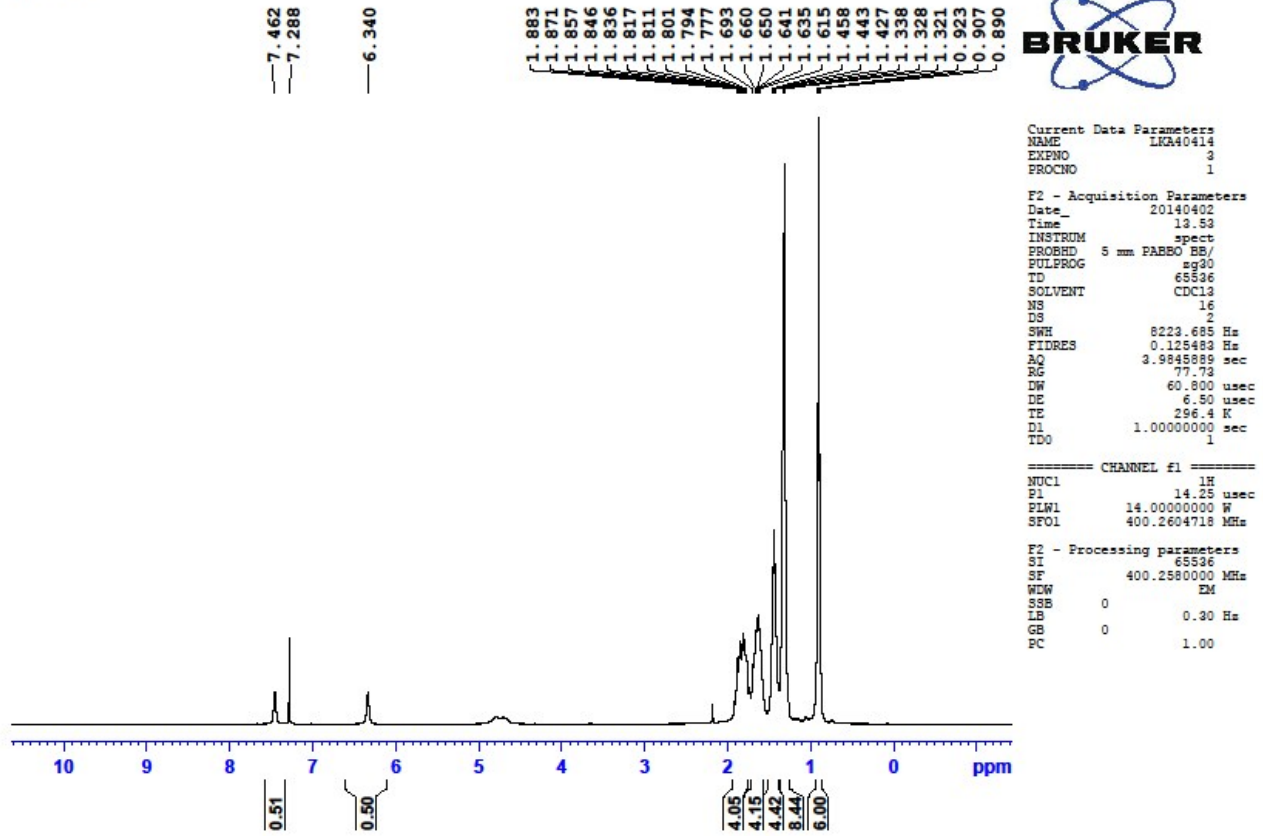

Fig. S1 <sup>1</sup>H-NMR of Di-*n*-hexyl phosphine oxide(DHePO)

RK-G-HPO

— 37.56  
— 34.73

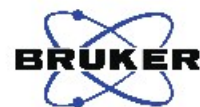

```
Current Data Parameters
NAME          LKA40414
EXPNO         4
PROCNO        1

F2 - Acquisition Parameters
Date_         20140402
Time          13.55
INSTRUM       spect
PROBHD        5 mm PABBO BB/
PULPROG       zg30
TD            65536
SOLVENT       CDCl3
NS            32
DS            4
SWH           64102.563 Hz
FIDRES        0.978127 Hz
AQ            0.5111808 sec
RG            199.6
DW            7.800 usec
DE            6.50 usec
TE            296.4 K
D1            2.00000000 sec
TDO           1
```

```
----- CHANNEL f1 -----
NUC1          31P
P1            14.50 usec
PLW1          15.00000000 W
SFO1          162.0193069 MHz
```

```
F2 - Processing parameters
SI            32768
SF            162.0274080 MHz
WDW           EM
SBB           0
LB            1.00 Hz
GB            0
PC            1.40
```

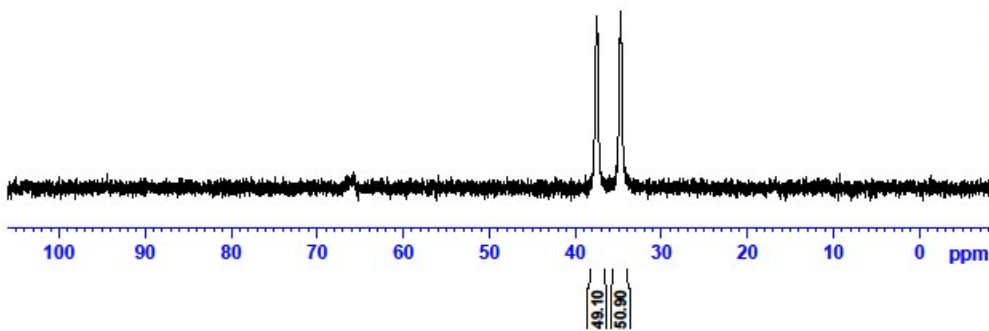

Fig. S2  $^{31}\text{P}$ -NMR of Di-*n*-hexyl phosphine oxide(DHePO)

Signature SIF VIT VELLORE  
DJ-DHPO

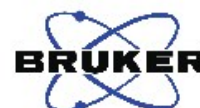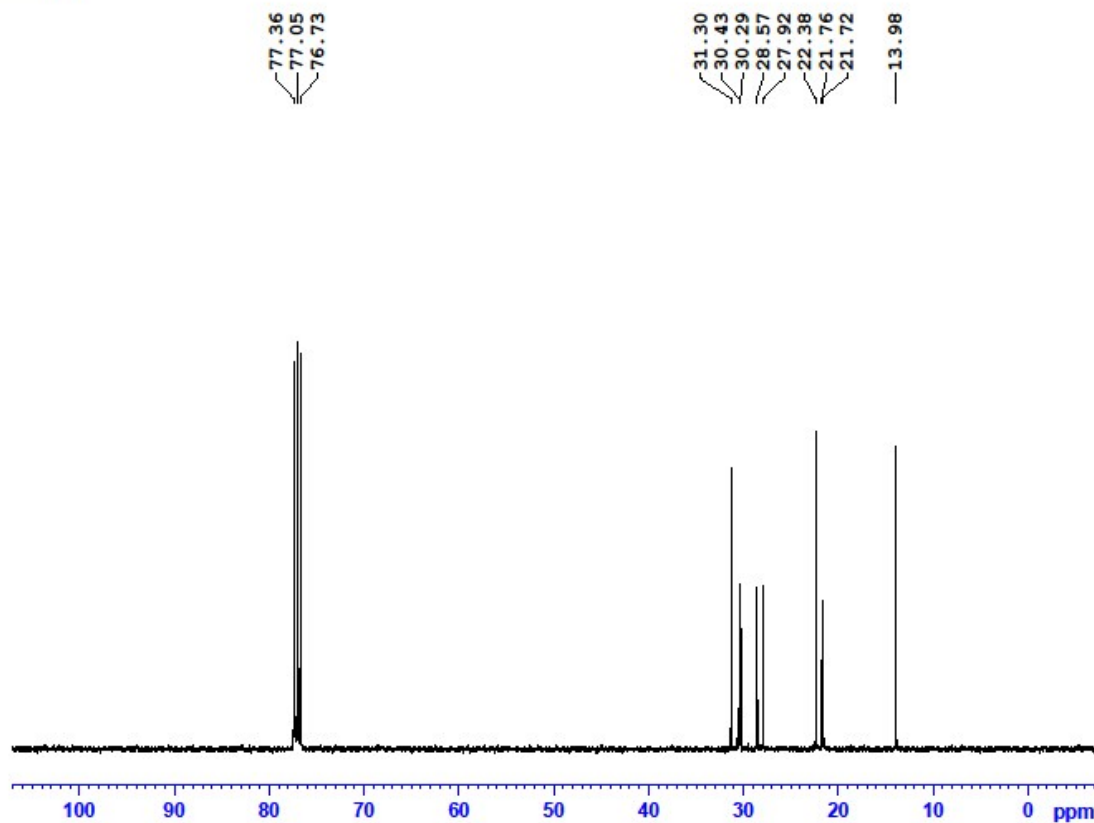

Fig. S3 <sup>13</sup>C-NMR of Di-*n*-hexyl phosphine oxide(DHePO)

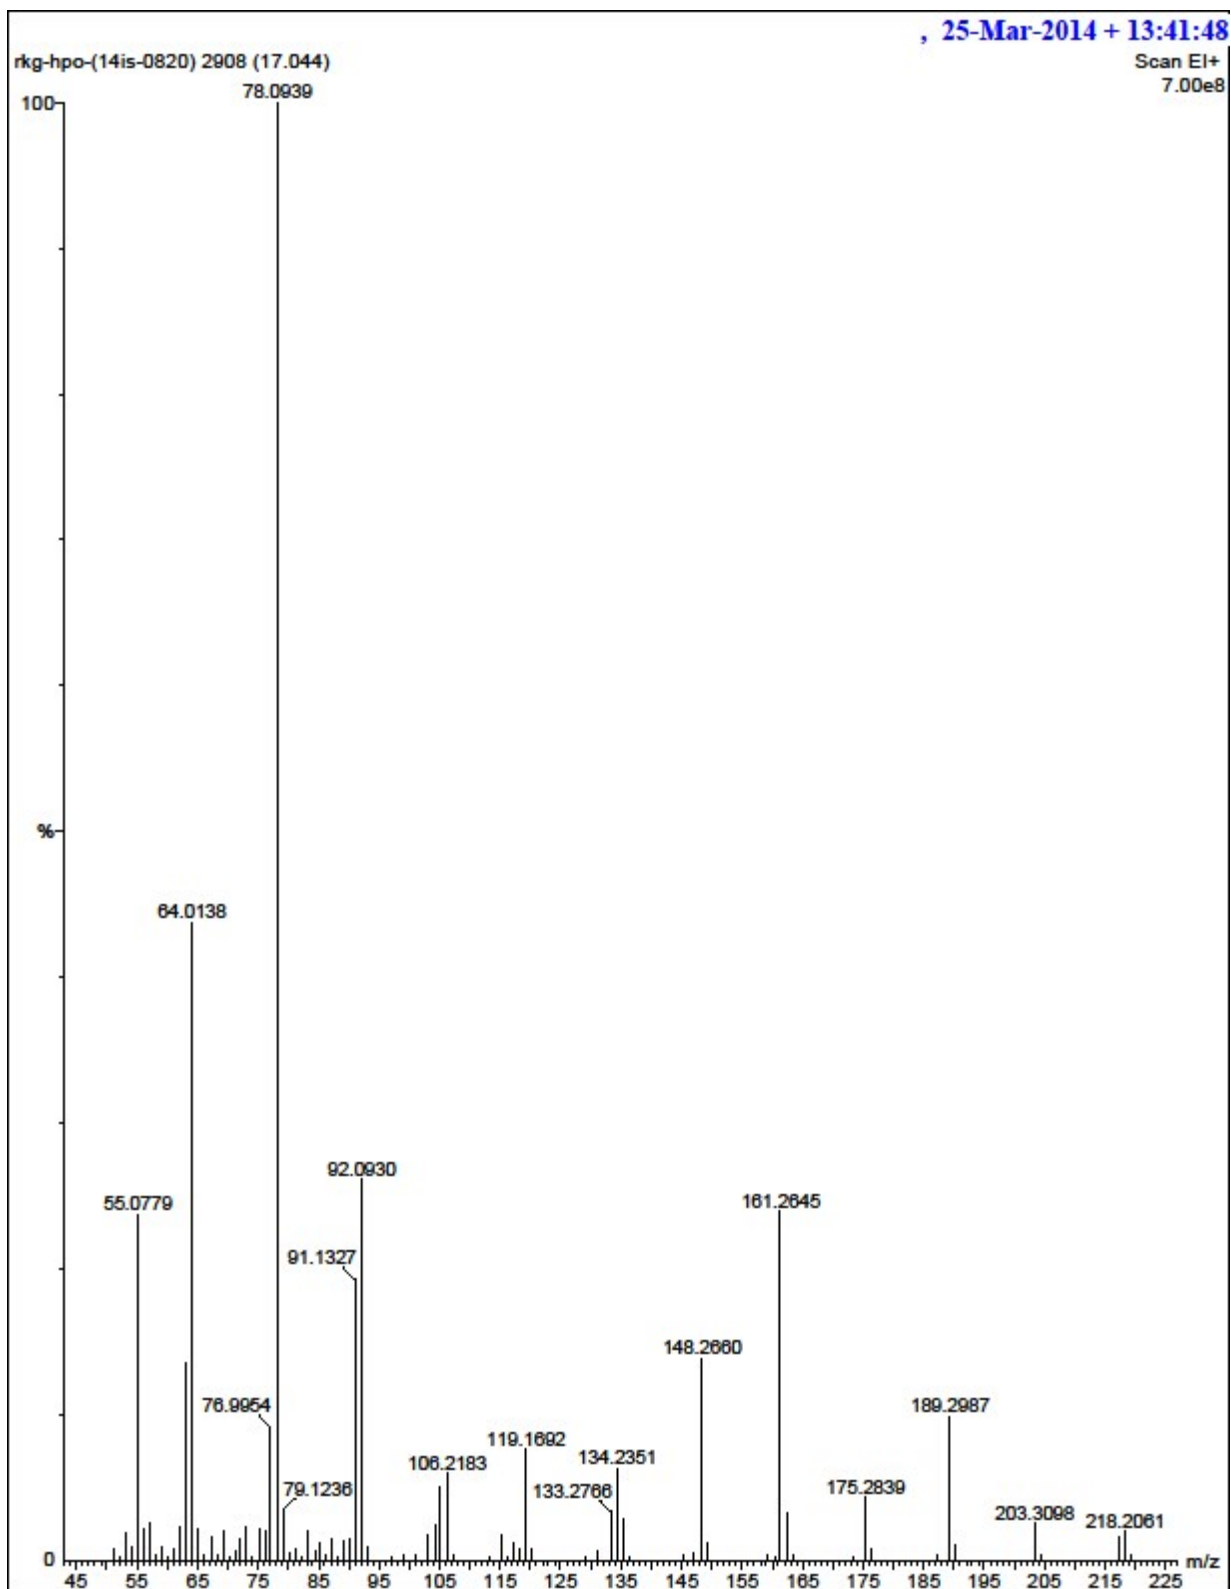

Fig. S4 EI mass spectra of Di-*n*-hexyl phosphine oxide(DHePO)



RK-G-HPO-TH-1H

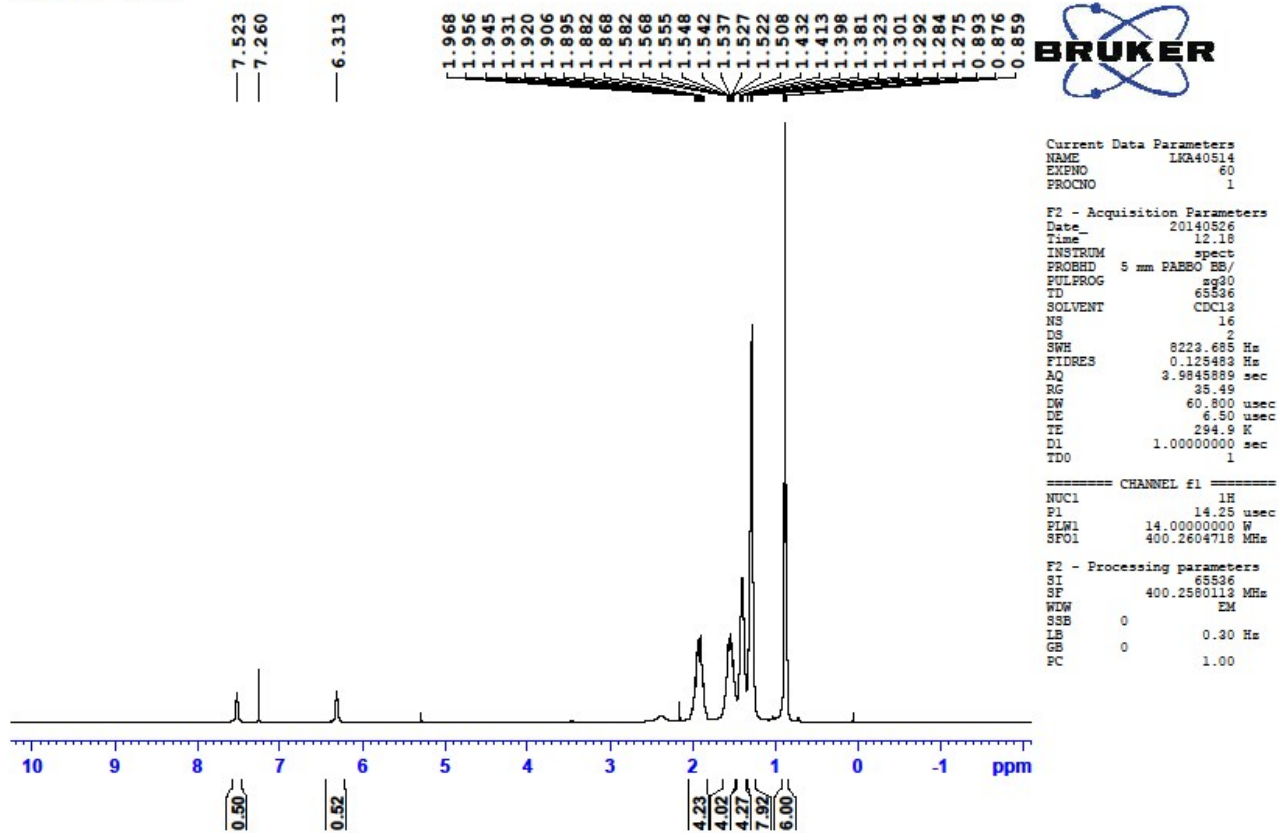

Fig. S5  $^1\text{H-NMR}$  of Thorium-DHePO complex

RK-G-HPO-TH-31P

—49.08  
—46.09

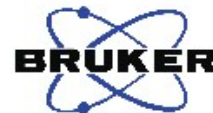

Current Data Parameters  
NAME LKA40514  
EXPNO 61  
PROCNO 1

F2 - Acquisition Parameters  
Date\_ 20140526  
Time 12.20  
INSTRUM spect  
PROBHD 5 mm PABBO BB/  
PULPROG zg30  
TD 65536  
SOLVENT CDCl3  
NS 32  
DS 4  
SWH 64102.563 Hz  
FIDRES 0.978127 Hz  
AQ 0.5111808 sec  
RG 199.6  
DM 7.800 usec  
DE 6.50 usec  
TE 294.8 K  
D1 2.00000000 sec  
TD0 1

----- CHANNEL f1 -----  
NUC1 31P  
P1 14.50 usec  
PLW1 15.00000000 W  
SFO1 162.0193069 MHz

F2 - Processing parameters  
SI 32768  
SF 162.0274080 MHz  
WDW EM  
SSB 0  
LB 1.00 Hz  
GB 0  
PC 1.40

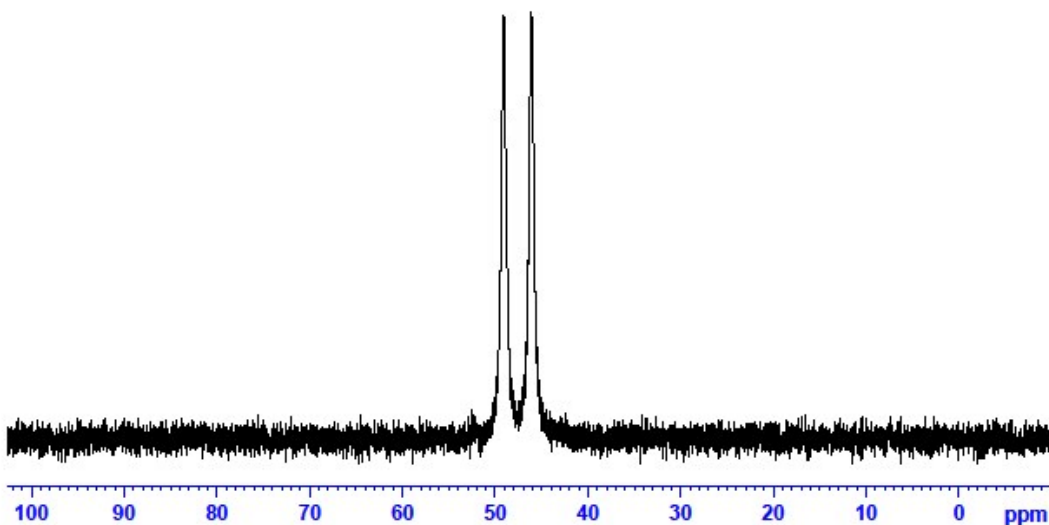

Fig. S6  $^{31}\text{P}$ -NMR of Thorium-DHePO complex

RK-G-HPOTH

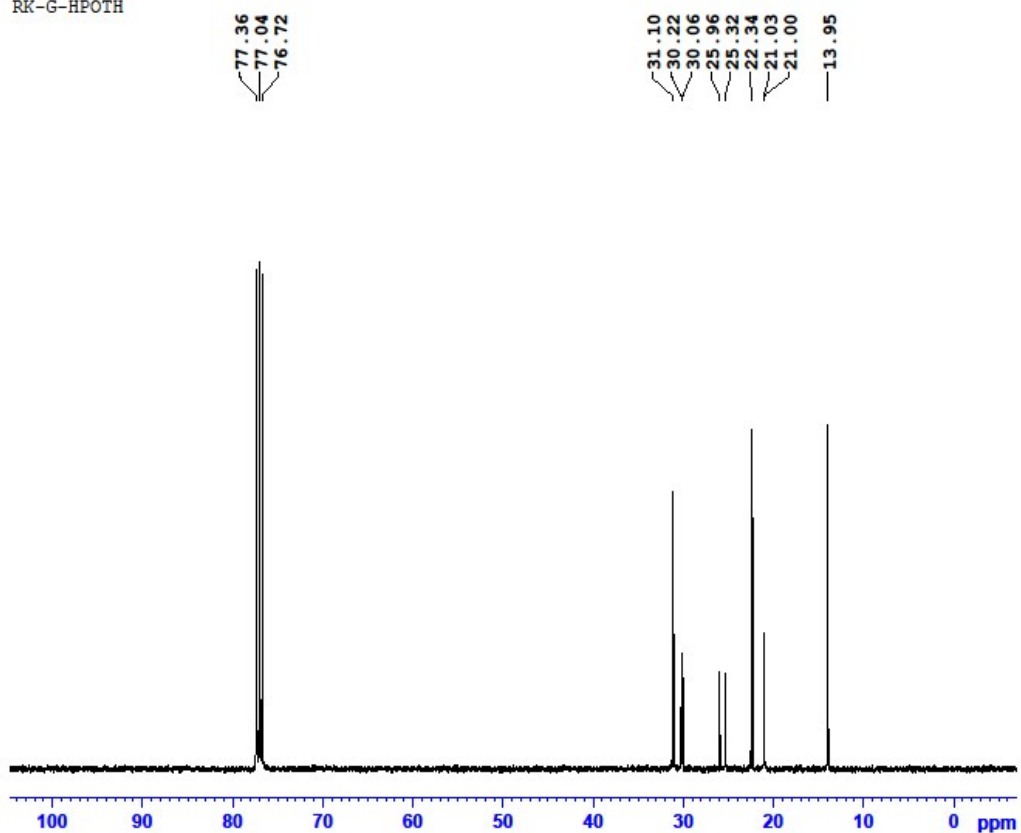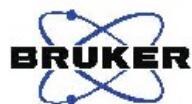

Current Data Parameters  
NAME LKA40215  
EXPNO 185  
PROCNO 1

F2 - Acquisition Parameters  
Date\_ 20150302  
Time 13.37  
INSTRUM spect  
PROBHD 5 mm PABBO BB/  
PULPROG zgpg30  
TD 65536  
SOLVENT CDCl3  
NS 512  
DS 4  
SWH 24038.461 Hz  
FIDRES 0.366798 Hz  
AQ 1.3631488 sec  
RG 175.97  
DW 20.800 usec  
DE 6.50 usec  
TE 303.1 K  
D1 2.0000000 sec  
D11 0.0200000 sec  
TDO 1

==== CHANNEL f1 =====  
NUC1 13C  
P1 9.80 usec  
PLW1 58.0000000 W  
SFO1 100.6550182 MHz

==== CHANNEL f2 =====  
CPDPRG2 waltz16  
NUC2 1H  
PCPD2 90.00 usec  
PLW2 14.0000000 W  
PLW12 0.35097000 W  
PLW13 0.28428999 W  
SFO2 400.2596010 MHz

F2 - Processing parameters  
SI 32768  
SF 100.6449540 MHz  
WDW EM  
SSB 0  
LB 1.00 Hz  
GB 0  
PC 1.40

Fig. S7 <sup>13</sup>C-NMR of Thorium-DHePO complex

RK-G-LAHPO-1H

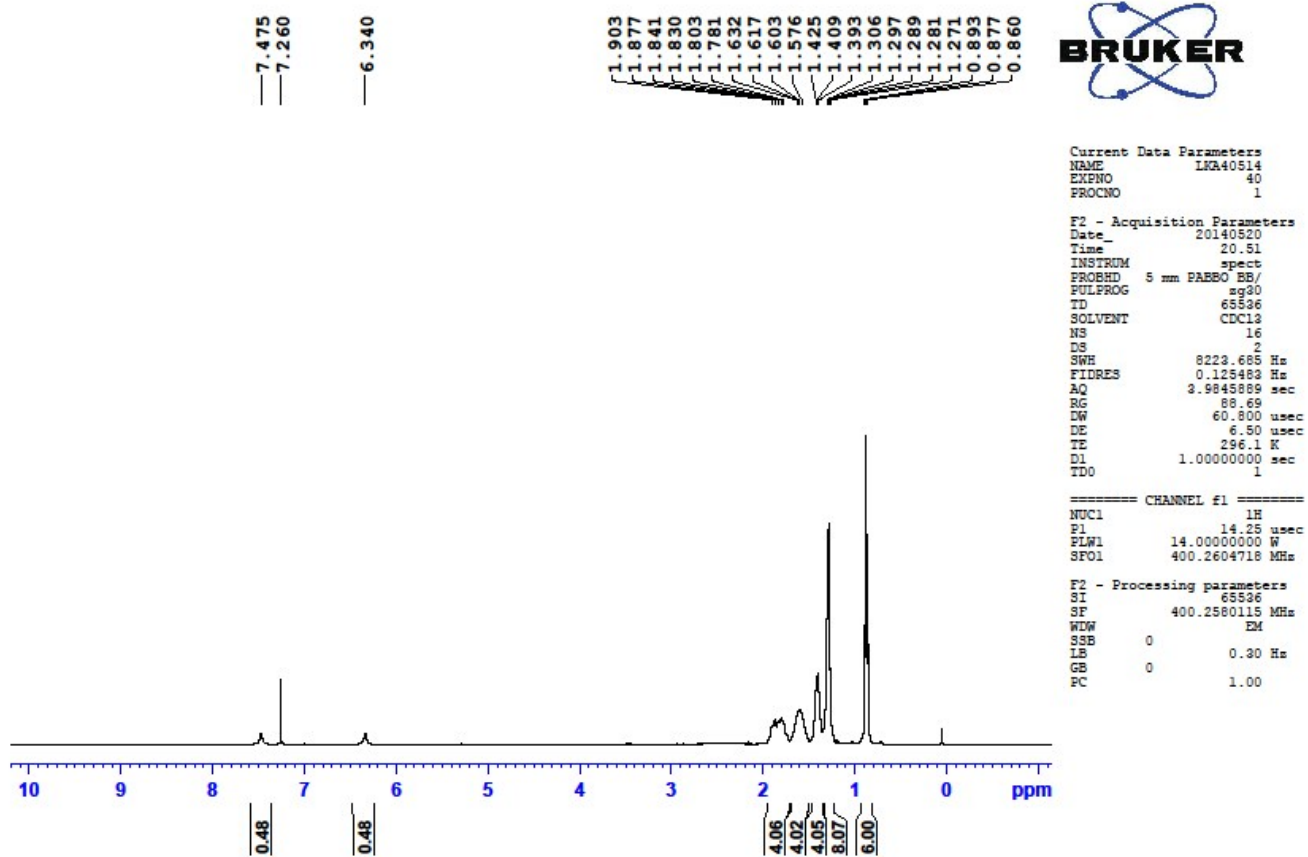

Fig. S8 <sup>1</sup>H-NMR of Lanthanum-DHePO complex

RK-G-LAHPO-31P

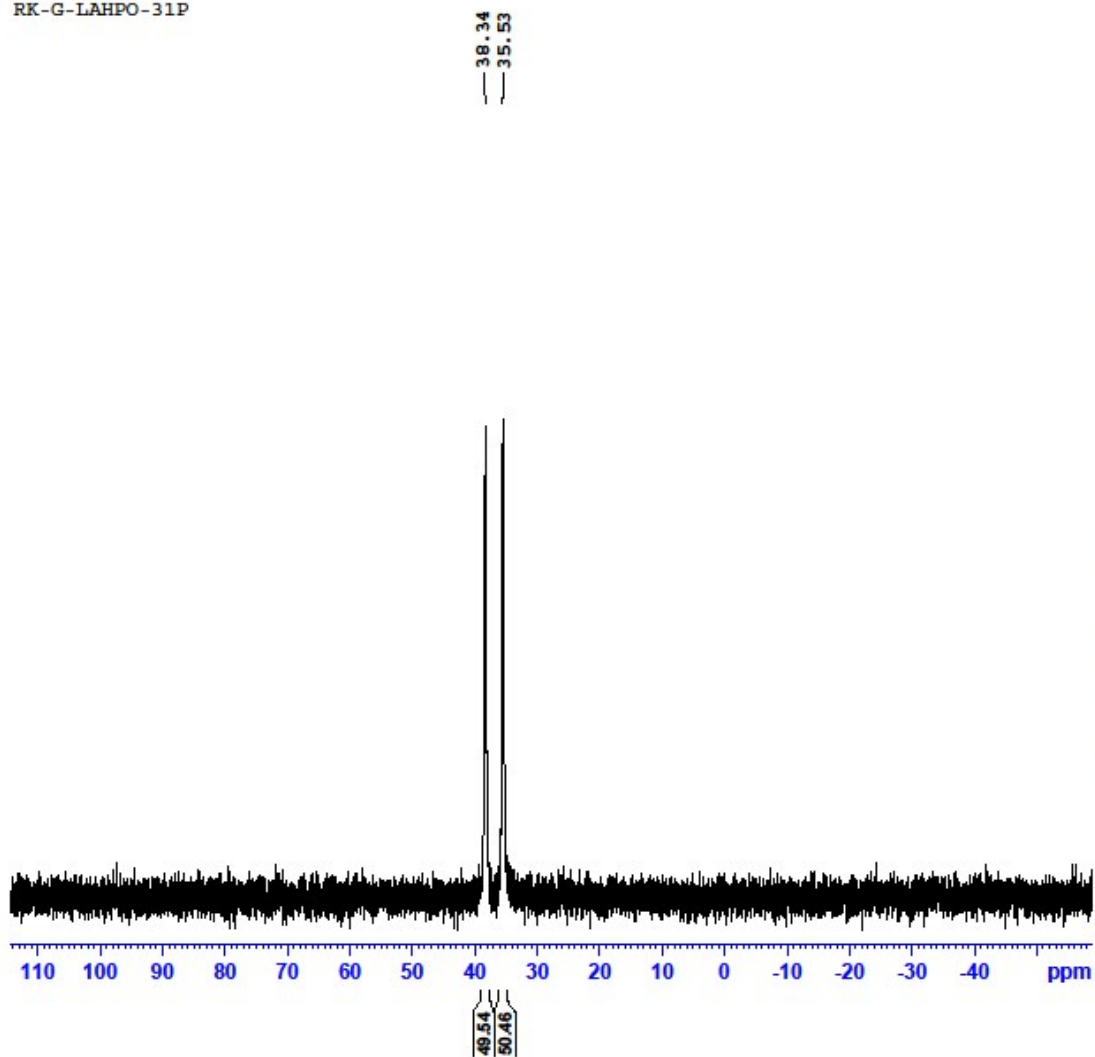

Current Data Parameters  
NAME LKA40514  
EXPNO 41  
PROCNO 1

F2 - Acquisition Parameters  
Date\_ 20140520  
Time 20.54  
INSTRUM spect  
PROBHD 5 mm PABBO BB/  
FULPROG zg30  
TD 65536  
SOLVENT CDCl3  
NS 32  
DS 4  
SWH 64102.563 Hz  
FIDRES 0.978127 Hz  
AQ 0.5111808 sec  
RG 199.6  
DW 7.800 usec  
DE 6.50 usec  
TE 296.0 K  
D1 2.00000000 sec  
TD0 1

----- CHANNEL f1 -----  
NUC1 31P  
P1 14.50 usec  
PLW1 15.00000000 W  
SFO1 162.0193069 MHz

F2 - Processing parameters  
SI 32768  
SF 162.0274080 MHz  
WDW EM  
SSB 0  
LB 1.00 Hz  
GB 0  
PC 1.40

Fig. S9  $^{31}\text{P}$ -NMR of Lanthanum-DHePO complex

RK-G-DHPO-LA

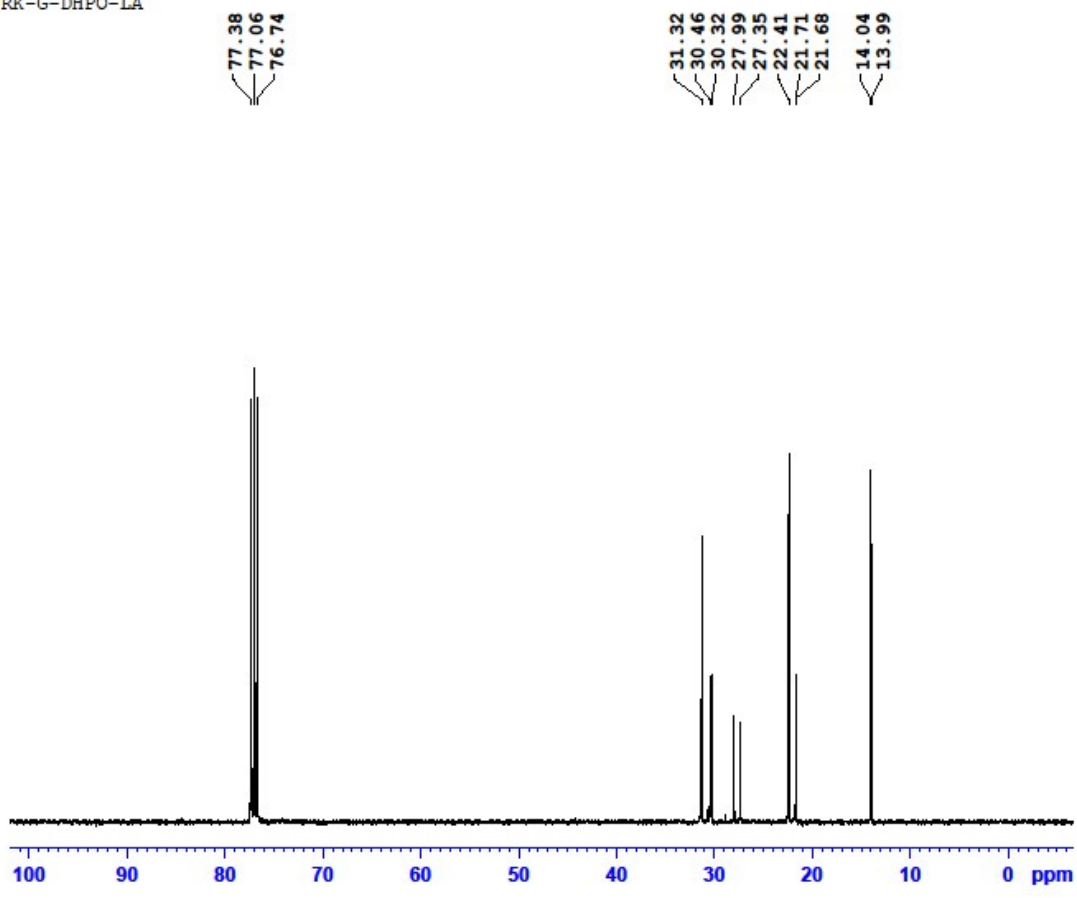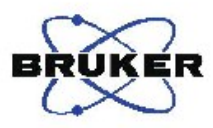

```
Current Data Parameters
NAME          LKA40215
EXPNO         186
PROCNO        1

F2 - Acquisition Parameters
Date_         20150302
Time          14.08
INSTRUM       spect
PROBHD        5 mm PABBO BB/
PULPROG       zgpg30
TD            65536
SOLVENT       CDCl3
NS            512
DS            4
SWH           24038.461 Hz
FIDRES        0.366798 Hz
AQ            1.3631488 sec
RG            199.6
DW            20.800 usec
DE            6.50 usec
TE            303.0 K
D1            2.00000000 sec
D11           0.03000000 sec
TD0           1

===== CHANNEL f1 =====
NUC1           13C
P1             9.80 usec
PLW1          58.00000000 W
SFO1          100.6550182 MHz

===== CHANNEL f2 =====
CPDPRG[2]     waltz16
NUC2           1H
PCPD2          90.00 usec
PLW2          14.00000000 W
PLW12         0.35097000 W
PLW13         0.28428999 W
SFO2          400.2596010 MHz

F2 - Processing parameters
SI            32768
SF            100.6449540 MHz
NUW           EM
SSB           0
LB            1.00 Hz
GB            0
PC            1.40
```

Fig. S10 <sup>13</sup>C-NMR of Lanthanum-DHPO complex

RK-G-HEPPO

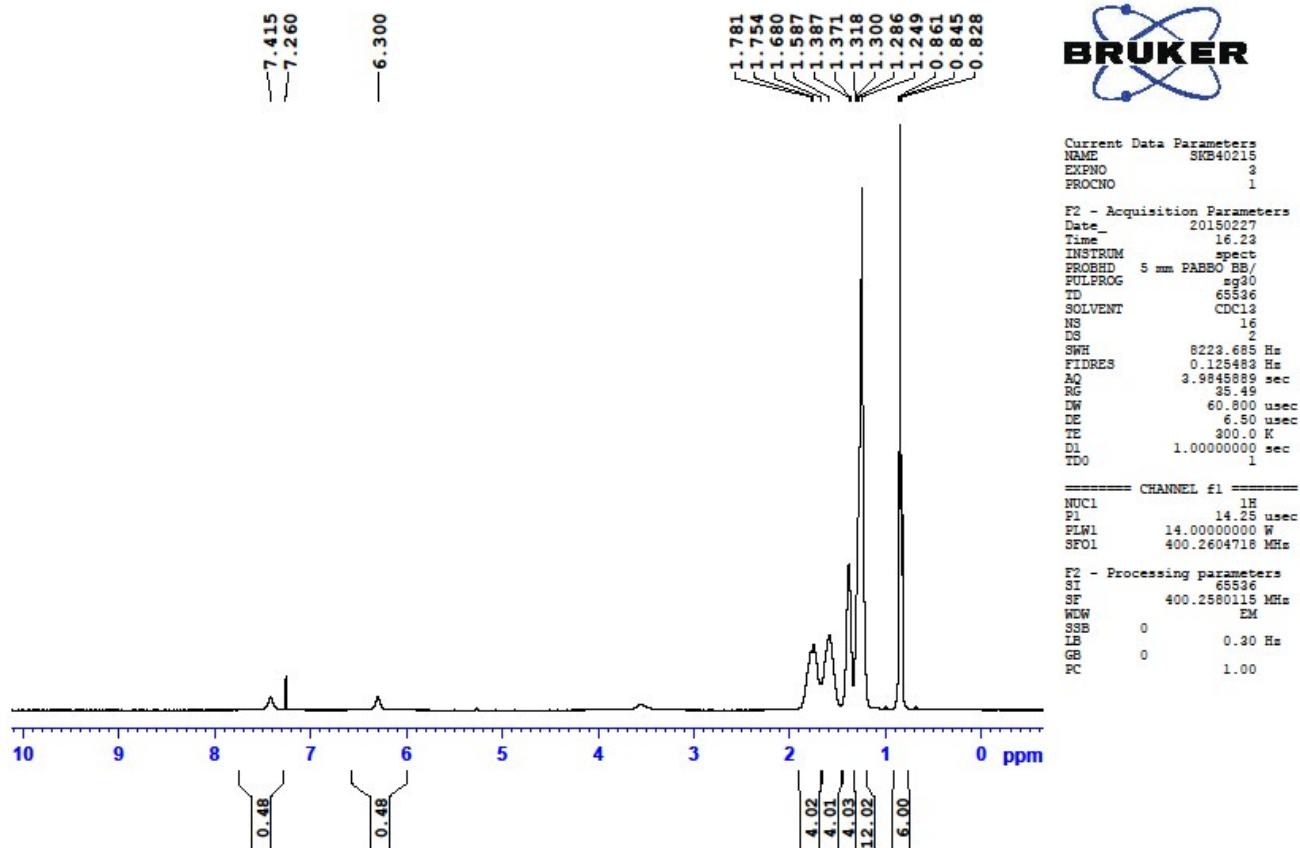

Fig. S11 <sup>1</sup>H-NMR of Di-*n*-heptyl phosphine oxide(DHpPO)

RK-G-HEPPO

36.96  
34.22

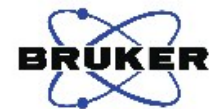

```
Current Data Parameters
NAME          SKB40215
EXPNO         4
PROCNO        1

F2 - Acquisition Parameters
Date_         20150227
Time          16.25
INSTRUM       spect
PROBHD        5 mm PABBO BB/
PULPROG       zg30
TD            65536
SOLVENT       CDCl3
NS            32
DS            4
SWH           64102.563 Hz
FIDRES        0.978127 Hz
AQ            0.5111808 sec
RG            199.6
DW            7.800 usec
DE            6.50 usec
TE            300.0 K
DL            2.00000000 sec
TDO           1

===== CHANNEL f1 =====
NUC1          31P
P1            14.50 usec
PLW1          15.00000000 W
SFO1          162.0193069 MHz

F2 - Processing parameters
SI            32768
SF            162.0274080 MHz
WDW           EM
SSB           0
LB            1.00 Hz
GB            0
PC            1.40
```

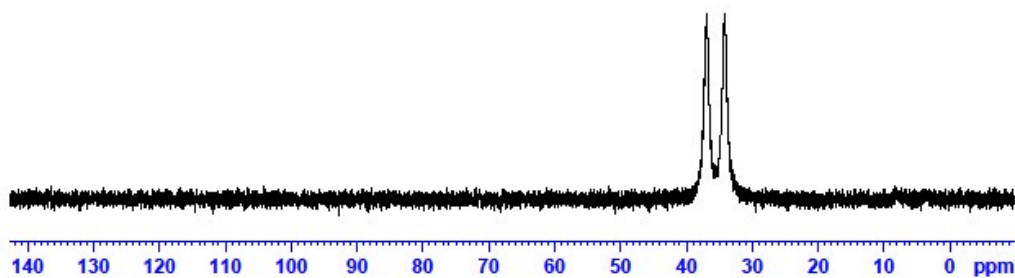

Fig. S12  $^{31}\text{P}$ -NMR of Di-*n*-heptyl phosphine oxide (DHpPO) complex



RK-G-HEPPO

77.39  
77.07  
76.75

31.52  
30.70  
30.57  
28.77  
22.55  
21.78  
14.00

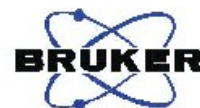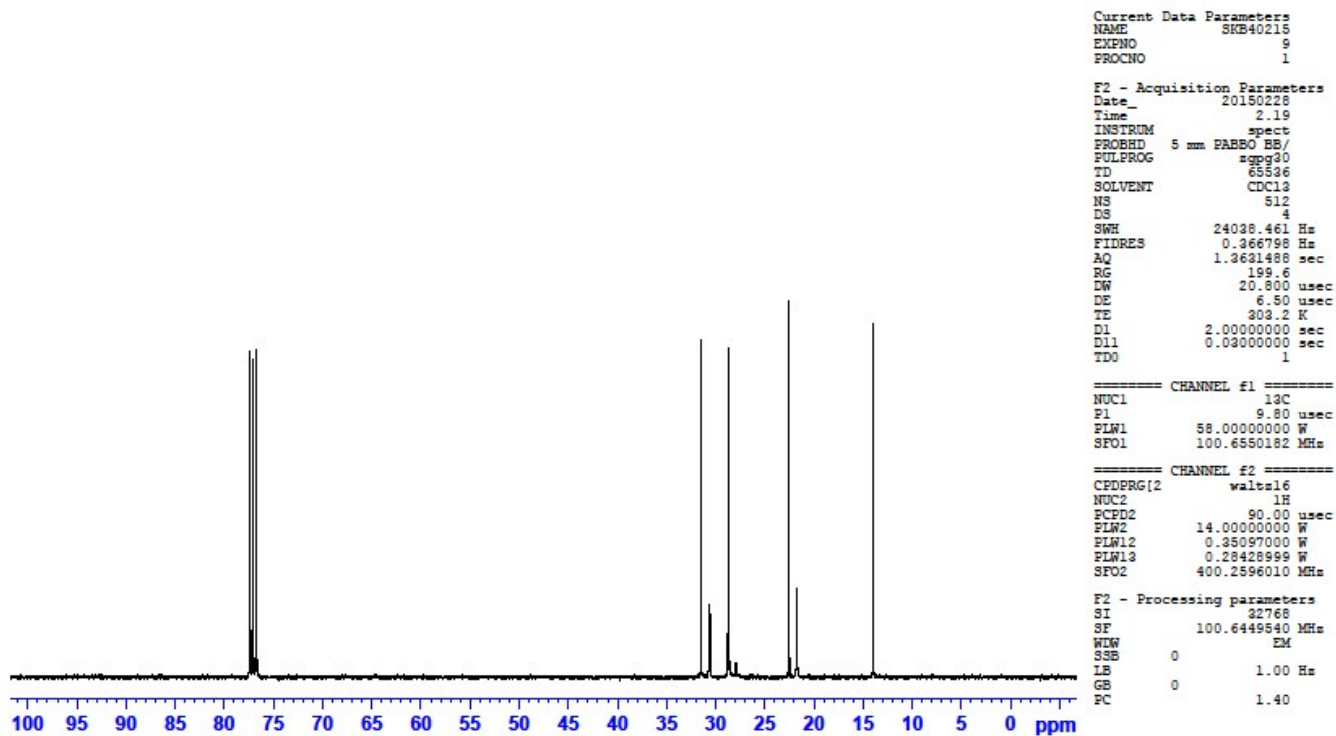

Fig. S13  $^{13}\text{C}$ -NMR of Di-*n*-heptyl phosphine oxide(DHpPO)

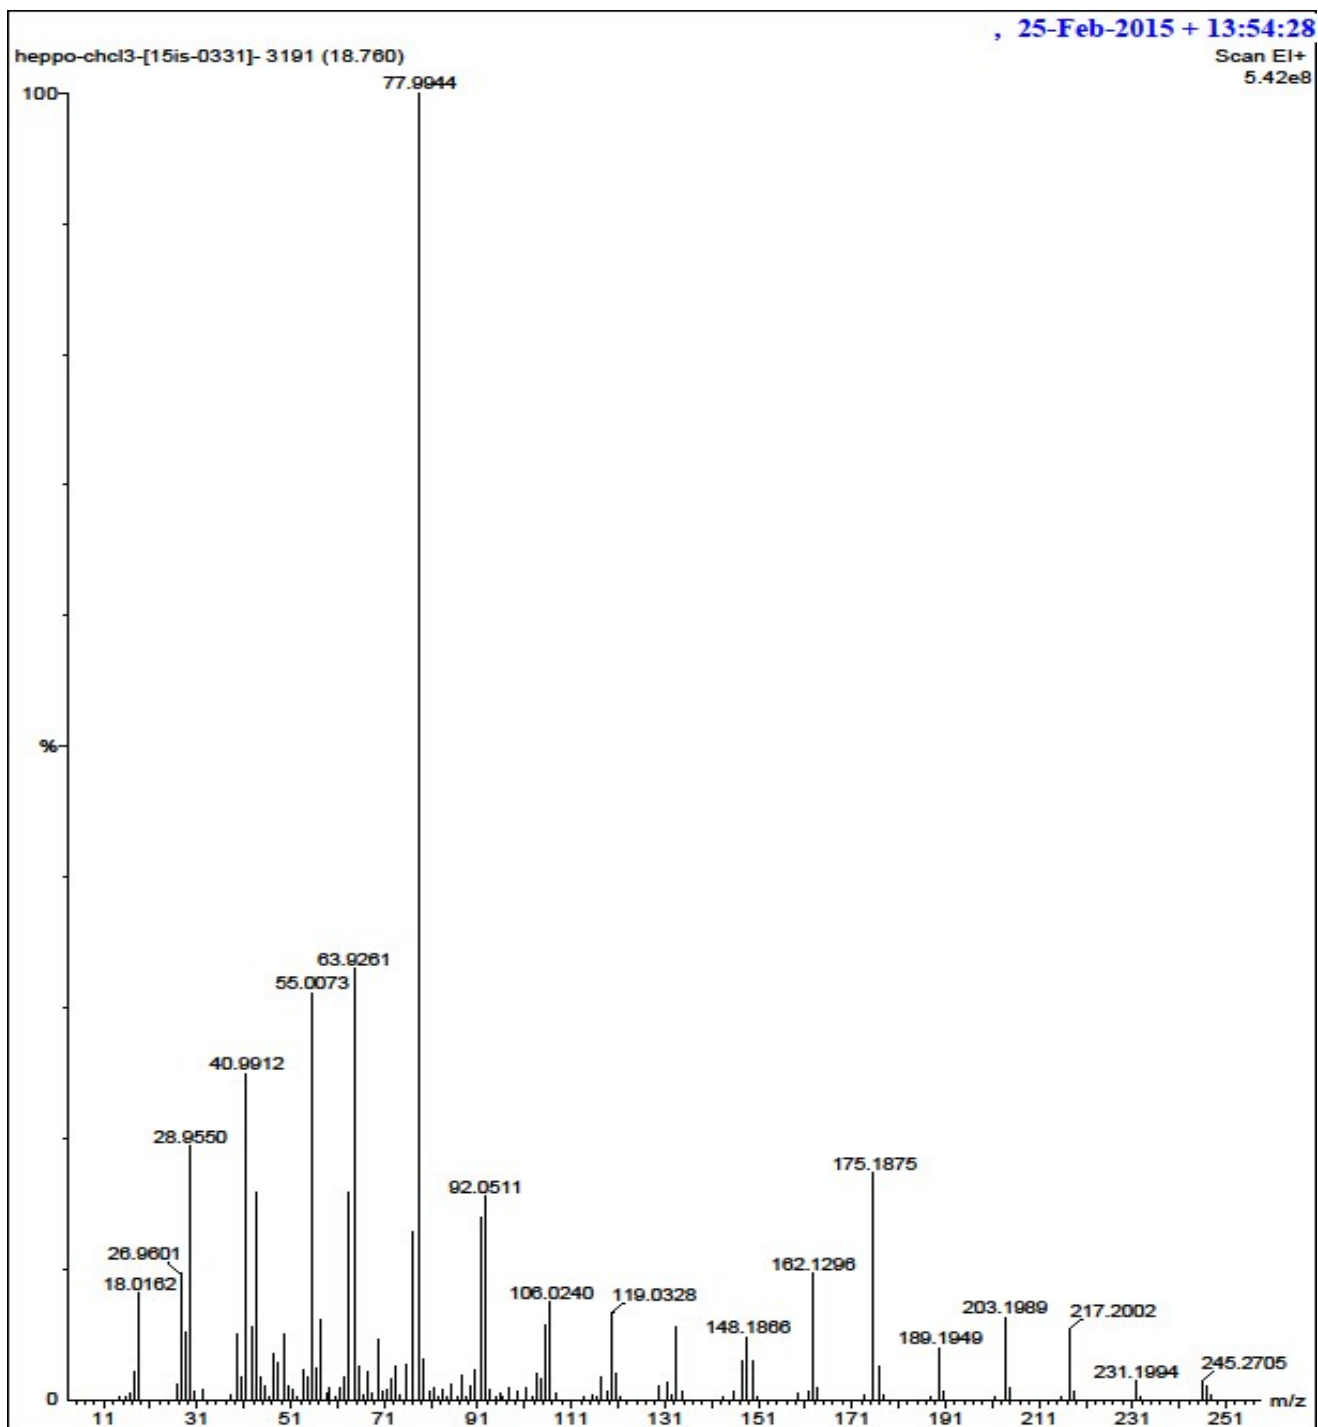

Fig.S14 EI mass spectra of Di-*n*-heptyl phosphine oxide(DHpPO)

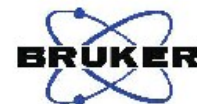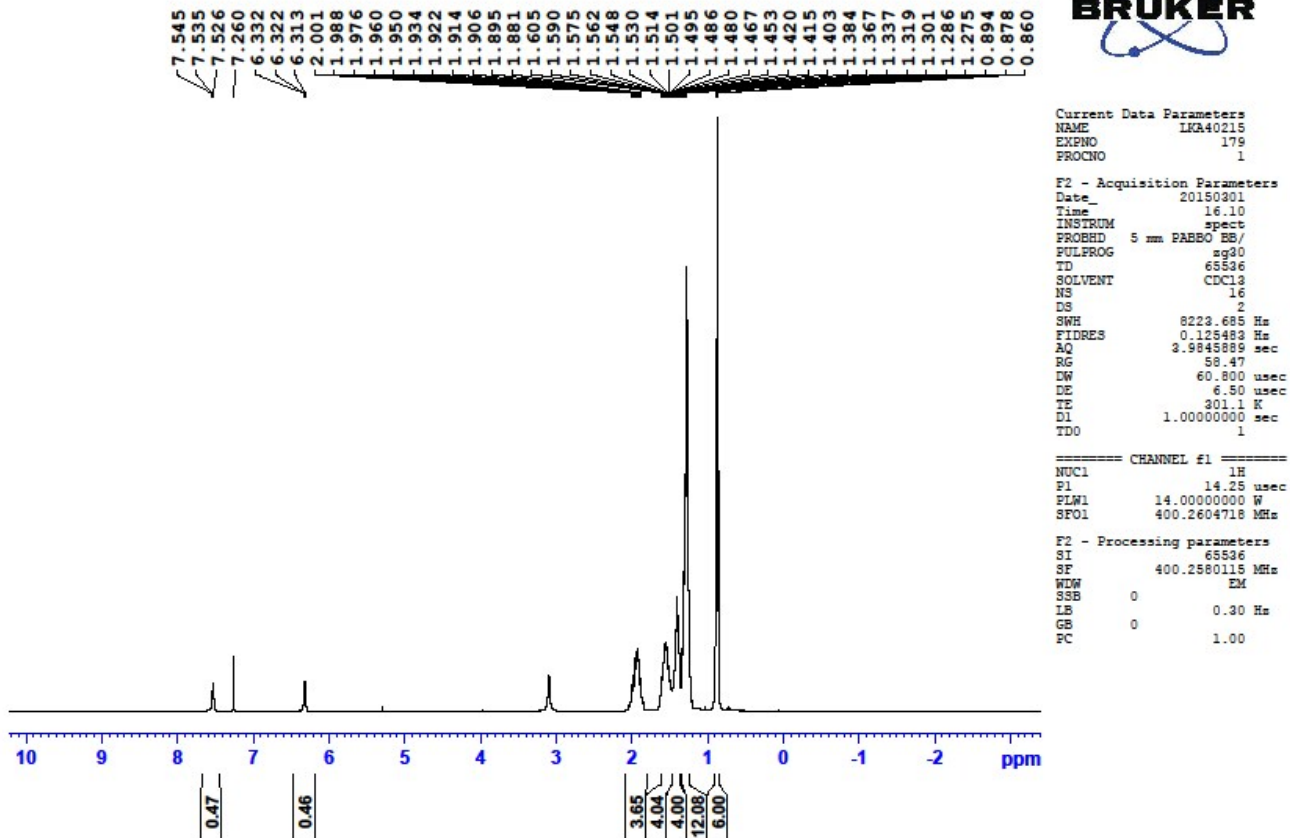

Fig. S15 <sup>1</sup>H-NMR of Thorium-DHpPO complex

HEPPOTH

— 50.68  
— 47.72

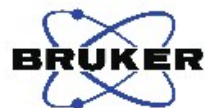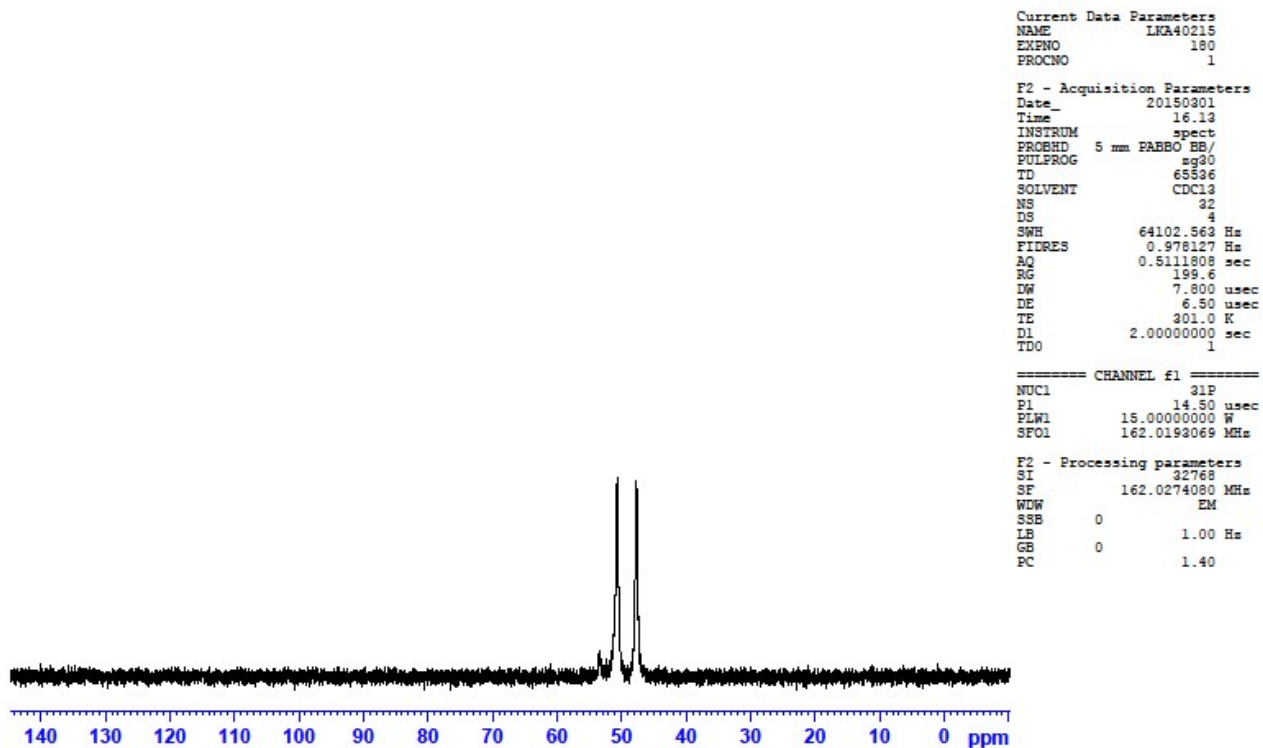

Fig. S16  $^{31}\text{P}$ -NMR of Thorium-DHpPO complex

RK-G-HEPPO-Th-13C

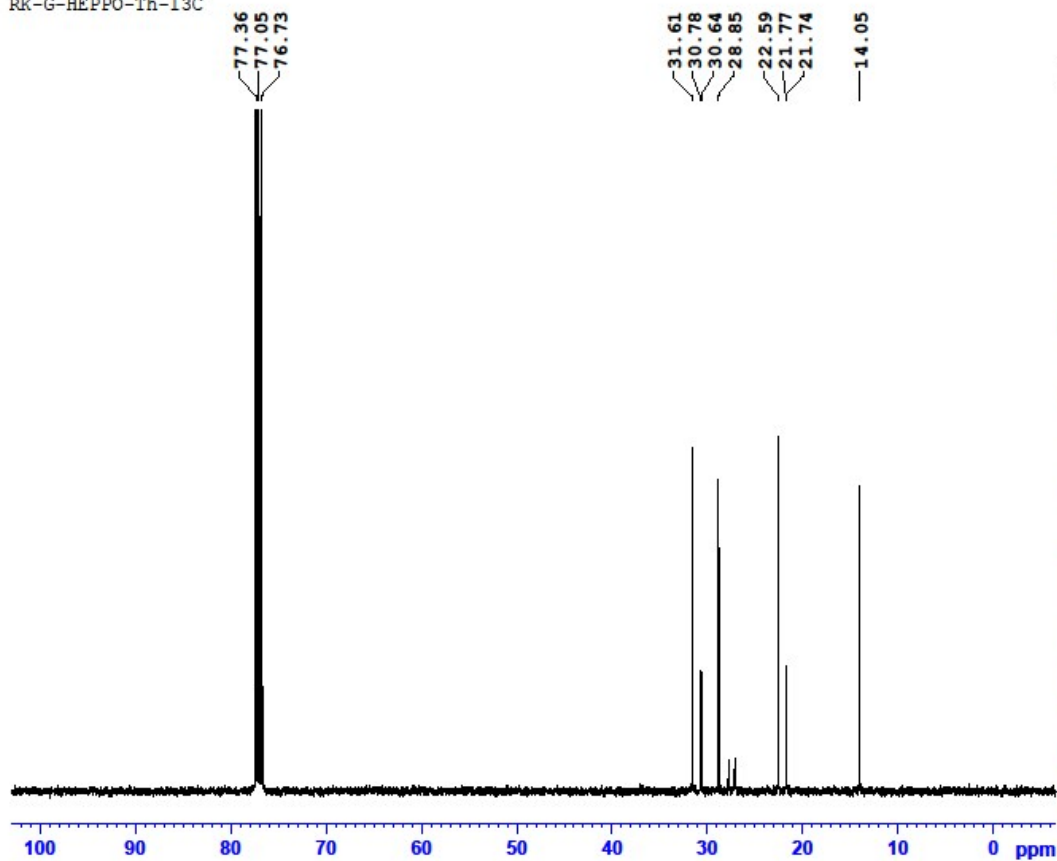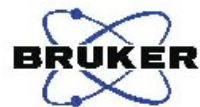

Current Data Parameters  
NAME LKA40215  
EXPNO 184  
PROCNO 1

F2 - Acquisition Parameters  
Date\_ 20150302  
Time\_ 12.23  
INSTRUM spect  
PROBHD 5 mm PABBO BB/  
PULPROG zgpg30  
TD 65536  
SOLVENT CDCl3  
NS 512  
DS 4  
SWH 24038.461 Hz  
FIDRES 0.266798 Hz  
AQ 1.3621488 sec  
RG 175.97  
DW 20.800 usec  
DE 6.50 usec  
TE 303.1 K  
D1 2.00000000 sec  
D11 0.03000000 sec  
TDO 1

==== CHANNEL f1 =====  
NUC1 13C  
P1 9.80 usec  
PLW1 58.0000000 W  
SFO1 100.6550182 MHz

==== CHANNEL f2 =====  
CPDPRG[2] waltz16  
NUC2 1H  
PCPD2 90.00 usec  
PLW2 14.00000000 W  
PLW12 0.35097000 W  
PLW13 0.28428999 W  
SFO2 400.2596010 MHz

F2 - Processing parameters  
SI 32768  
SF 100.6449540 MHz  
WDW EM  
SSB 0  
LB 1.00 Hz  
GB 0  
PC 1.40

Fig. S17 <sup>13</sup>C-NMR of Thorium-DHpPO complex

RK-G-HEPPO-La

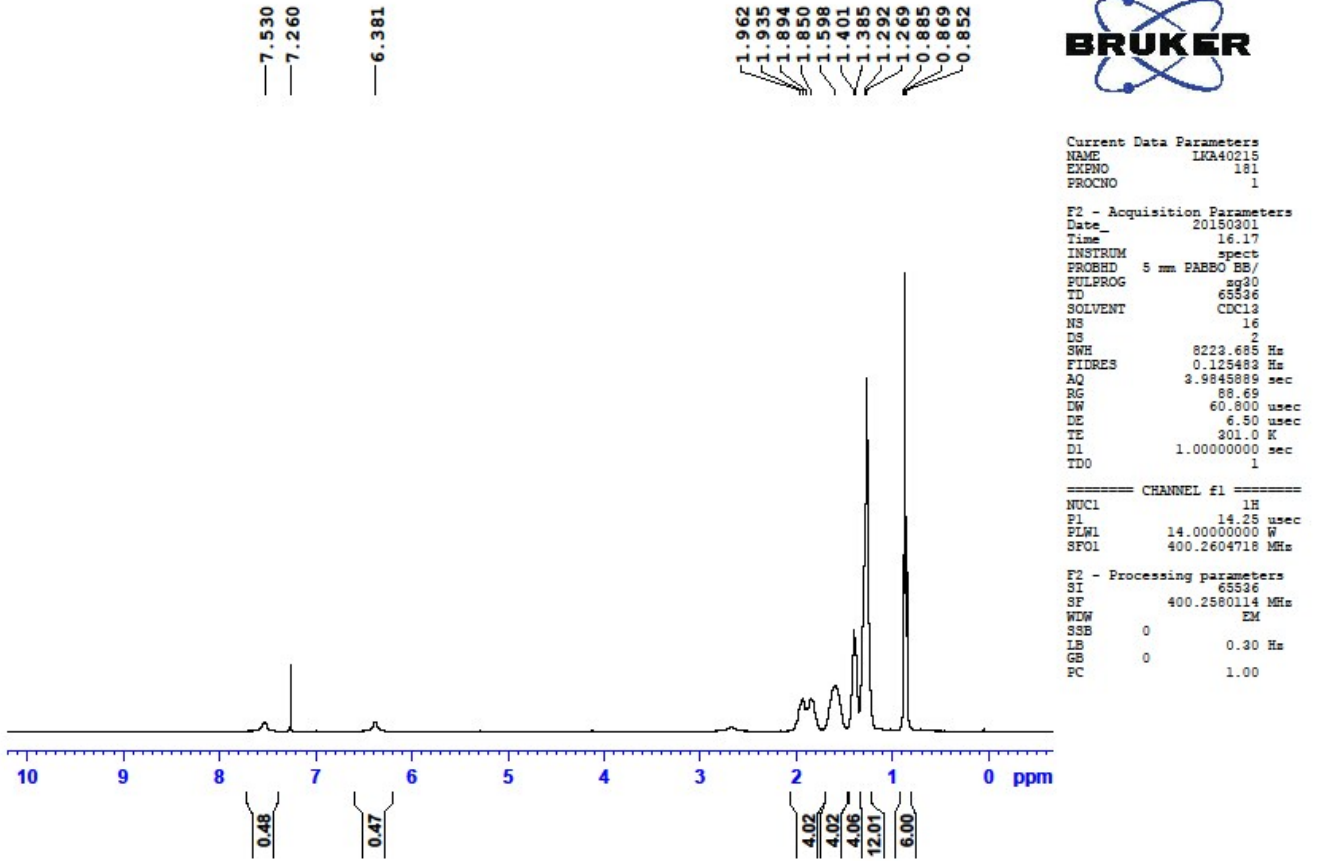

Fig. S18 <sup>1</sup>H-NMR of Lanthanum-DHpPO complex

RK-G-HEPPO-La

— 39.99  
— 37.14

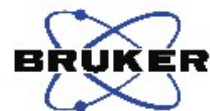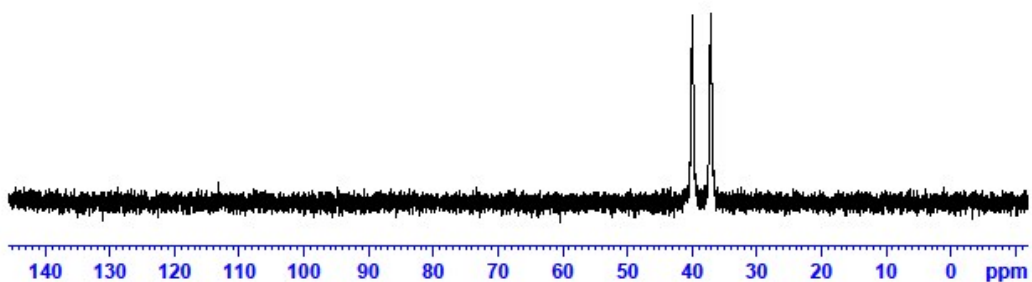

```
Current Data Parameters
NAME          LKA40215
EXPNO         182
PROCNO        1

F2 - Acquisition Parameters
Date_         20150301
Time_         16.19
INSTRUM       spect
PROBHD        5 mm FAEBO BB/
PULPROG       zg30
TD            65536
SOLVENT       CDCl3
NS            32
DS            4
SWH           64102.563 Hz
FIDRES        0.978127 Hz
AQ            0.5111808 sec
RG            199.6
DW            7.800 usec
DE            6.50 usec
TE            301.0 K
D1            2.00000000 sec
TDO           1

===== CHANNEL f1 =====
NUC1          31P
P1            14.50 usec
PLW1          15.00000000 W
SFO1          162.0193069 MHz

F2 - Processing parameters
SI            32768
SF            162.0274080 MHz
WDW           EM
SSB           0
LB            1.00 Hz
GB            0
PC            1.40
```

Fig. S19  $^{31}\text{P}$ -NMR of Lanthanum-DHpPO complex

HEPPO-La-13C

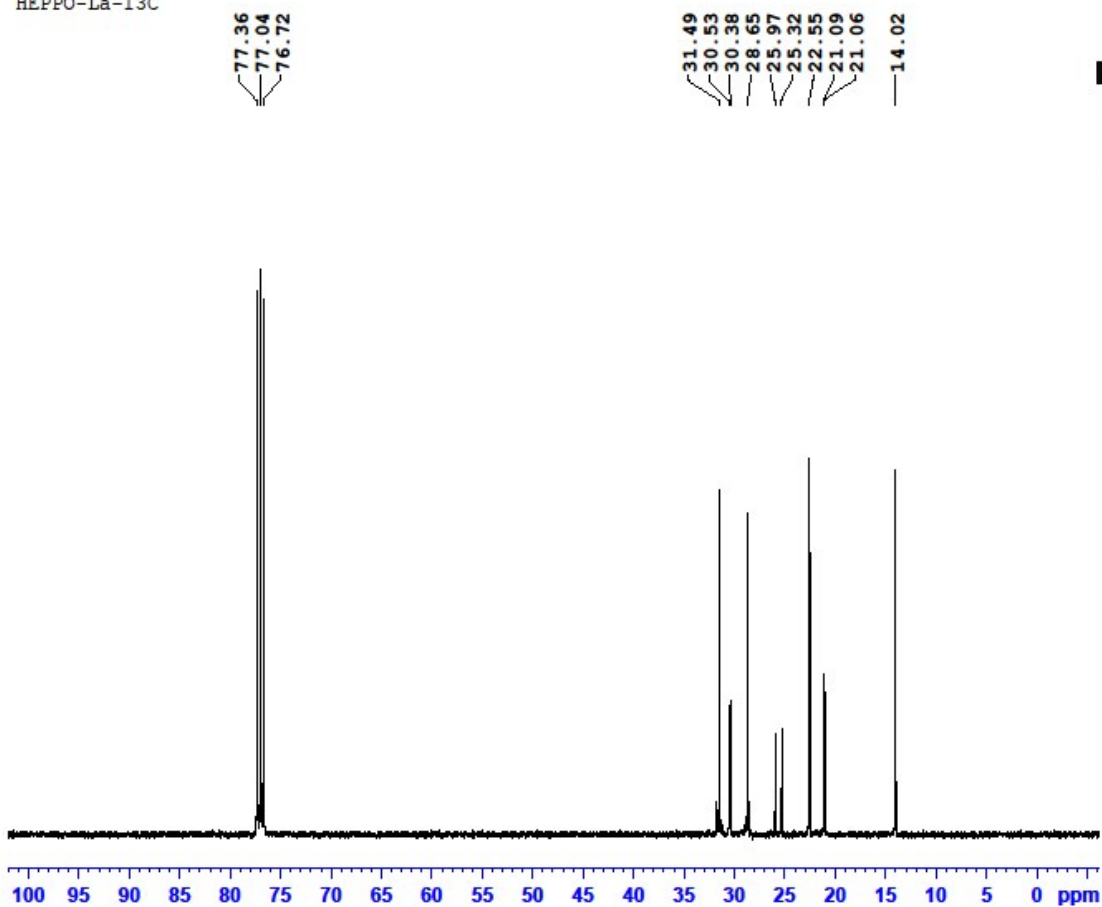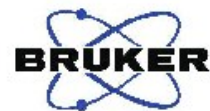

Current Data Parameters  
NAME LKA40215  
EXNO 183  
PROCNO 1

F2 - Acquisition Parameters  
Date\_ 20150302  
Time 10.09  
INSTRUM spect  
PROBHD 5 mm PABBO BB/  
PULPROG zgpg30  
TD 65536  
SOLVENT CDC13  
NS 512  
DS 4  
SWH 24038.461 Hz  
FIDRES 0.366798 Hz  
AQ 1.3621488 sec  
RG 199.6  
DW 20.800 usec  
DE 6.50 usec  
TE 303.2 K  
D1 2.00000000 sec  
D11 0.03000000 sec  
TDO 1

===== CHANNEL #1 =====  
NUC1 13C  
P1 9.80 usec  
PLW1 58.00000000 W  
SFO1 100.6250182 MHz

===== CHANNEL #2 =====  
CPDPRG[2] waltz16  
NUC2 1H  
PCPD2 90.00 usec  
PLW2 14.00000000 W  
PLW12 0.35097000 W  
PLW13 0.28428999 W  
SFO2 400.2596010 MHz

F2 - Processing parameters  
SI 32768  
SF 100.6449540 MHz  
WDW EM  
SSE 0  
LB 1.00 Hz  
GB 0  
PC 1.40

Fig. S20 <sup>13</sup>C-NMR of Lanthanum-DHppO complex



Signature SIF VIT VELLORE  
DJ-DOPO

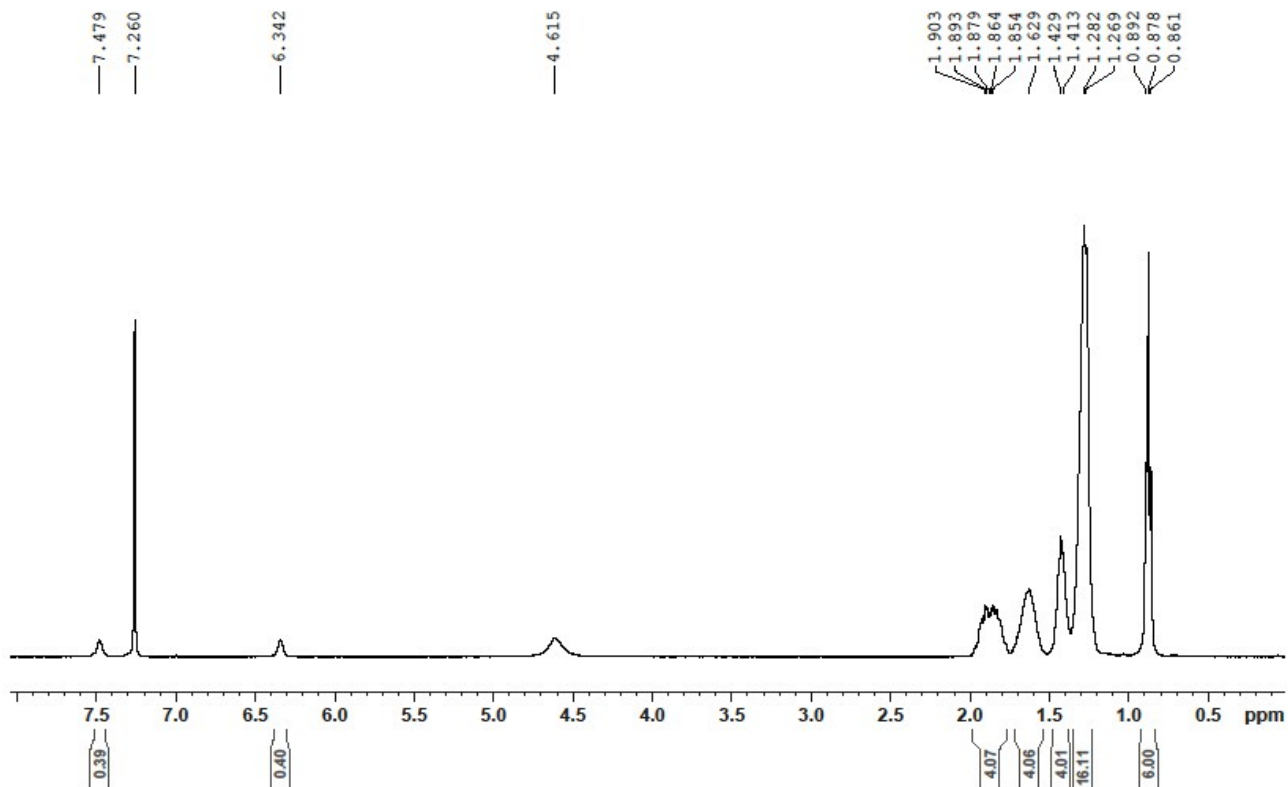

Fig. S21 <sup>1</sup>H-NMR of Di-*n*-octyl phosphine oxide(DOPO)

RK-G-DOPO

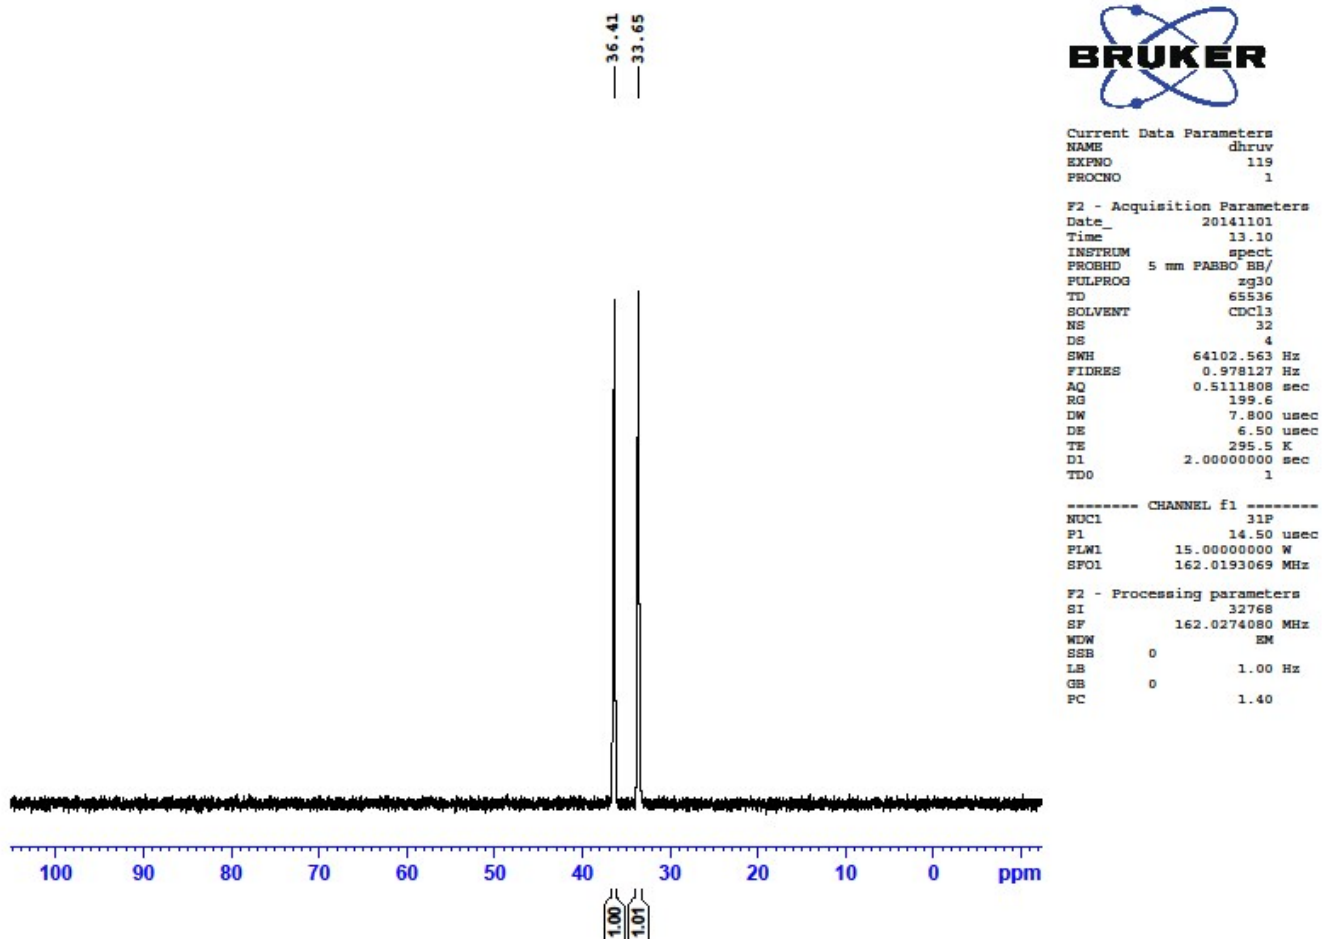

Fig. S22  $^{31}\text{P}$  NMR of Di-*n*-octyl phosphine oxide(DOPO)

Signature SIF VIT VELLORE  
DU-OCT-PO

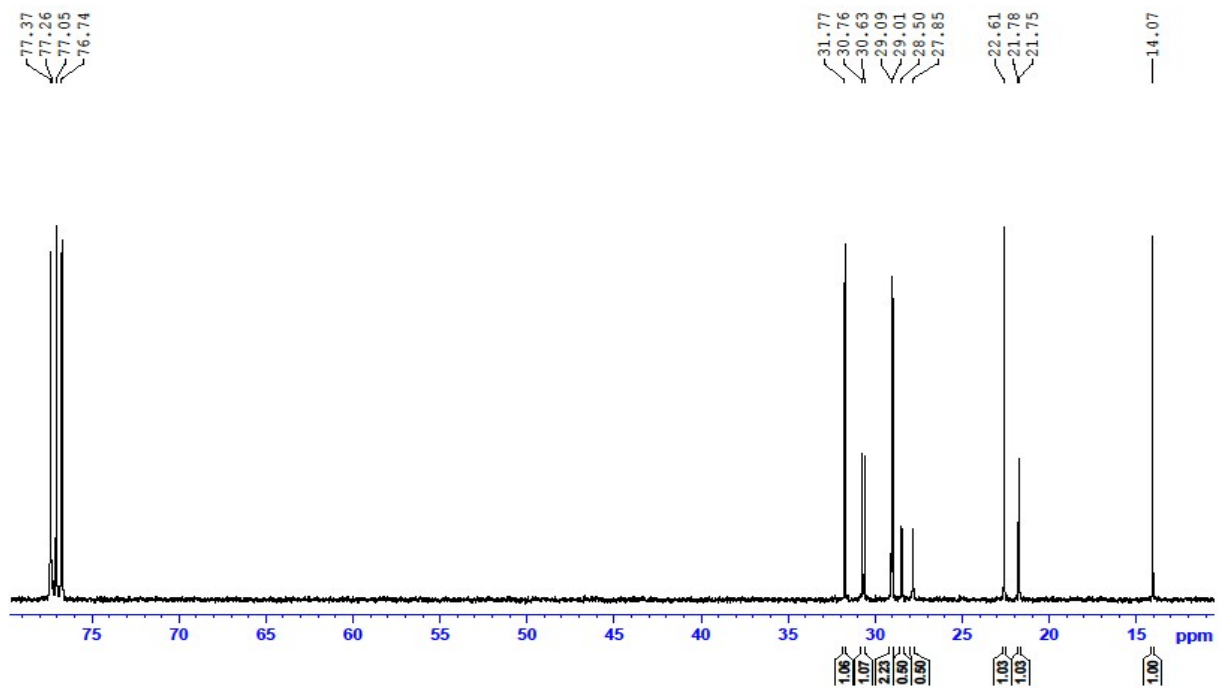

Fig. S23  $^{13}\text{C}$  NMR of Di-*n*-octyl phosphine oxide(DOPO)

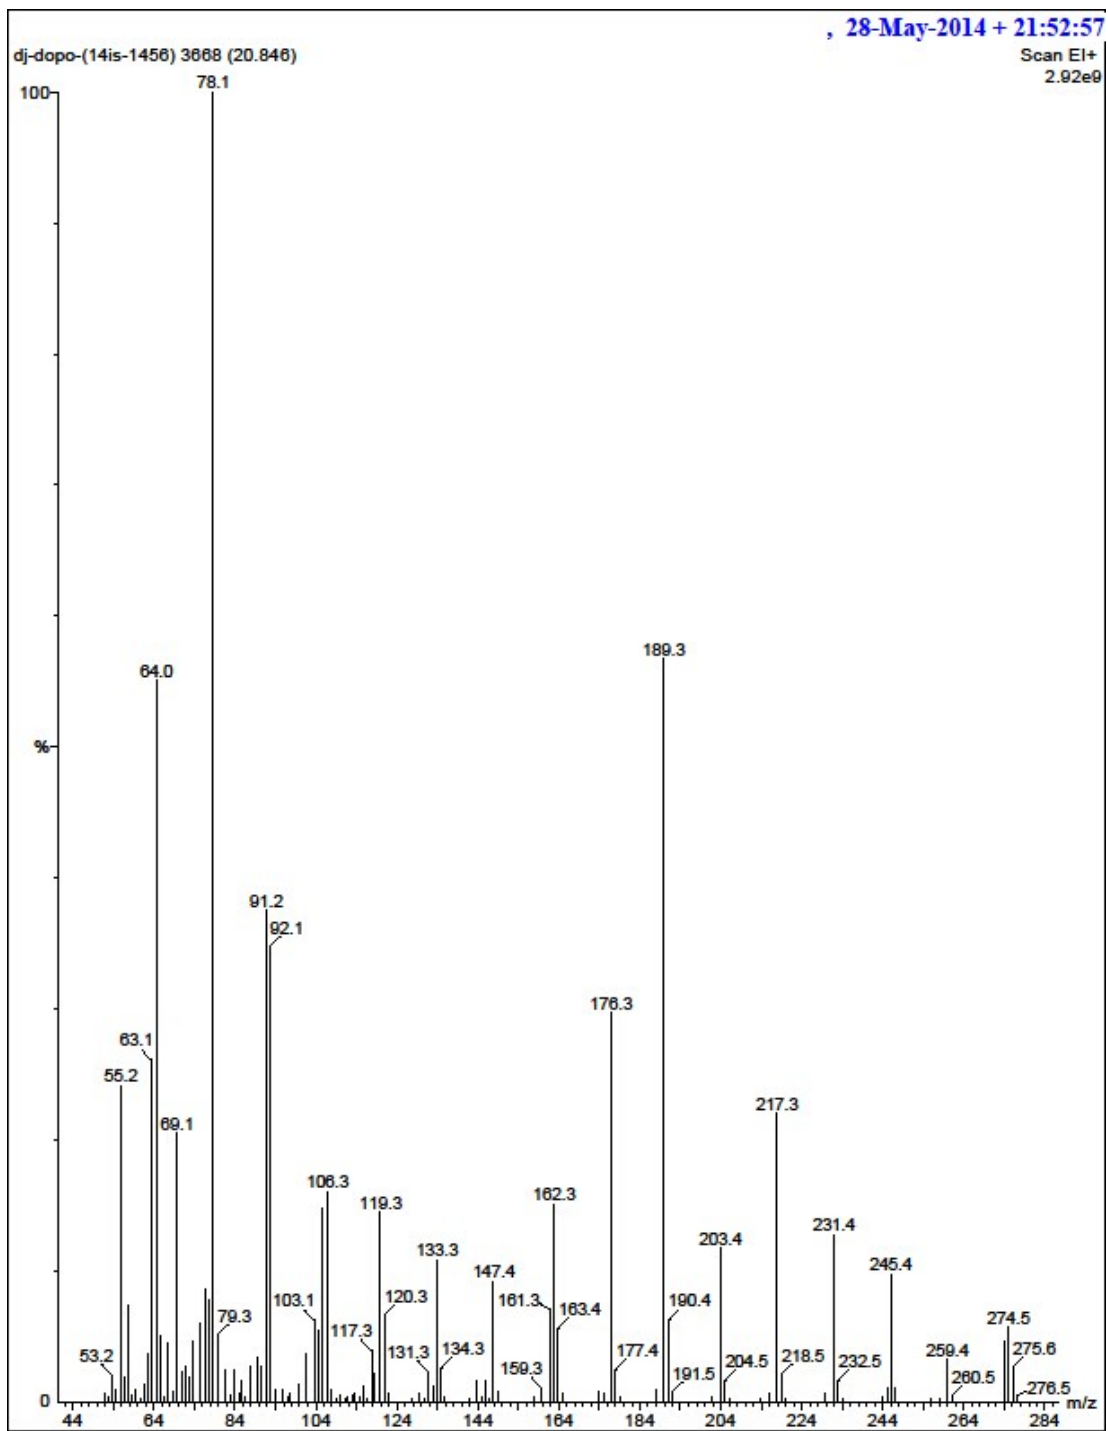

Fig.S24 EI mass spectra of Di-*n*-octyl phosphine oxide(DOPO)

RK-G-IH-OPO

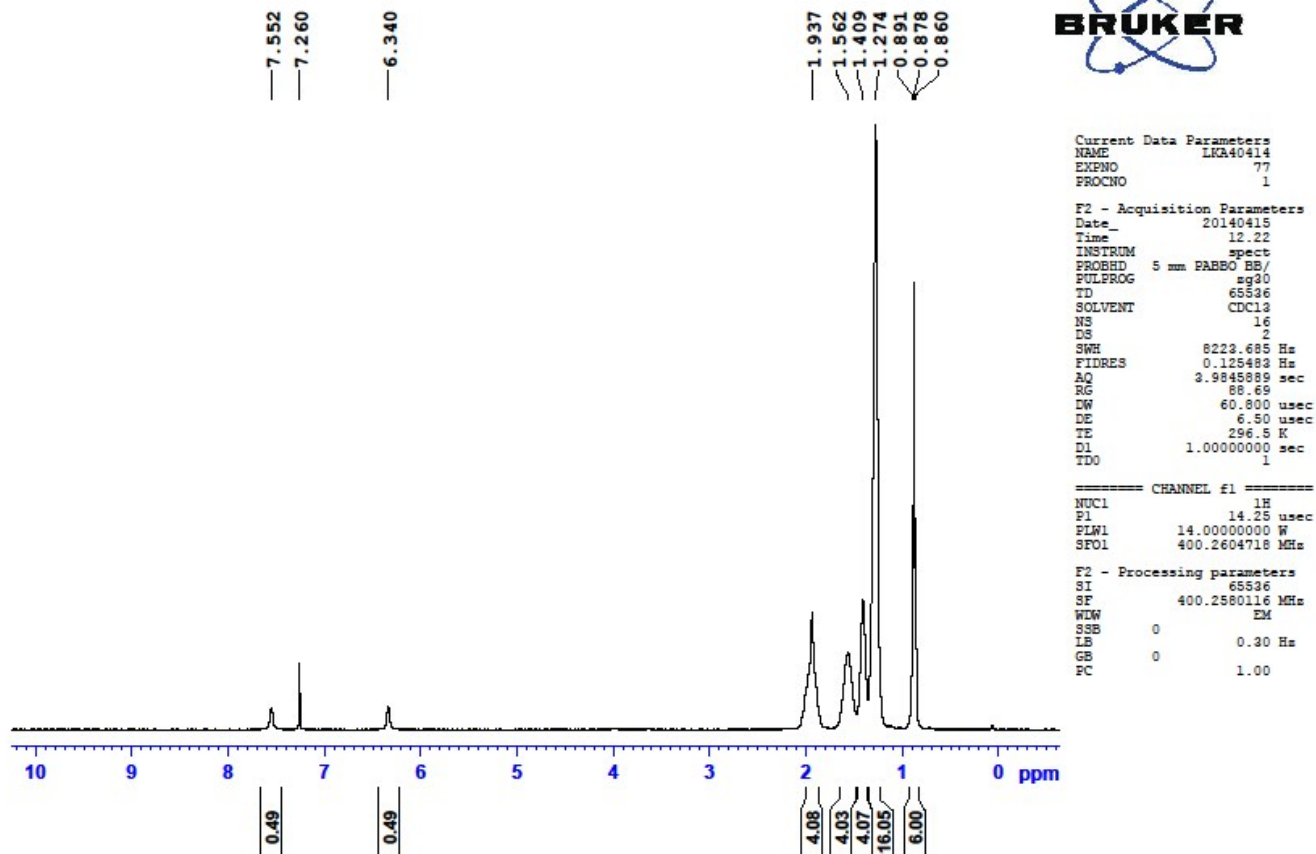

Fig. S25 <sup>1</sup>H-NMR of Thorium-DOPO complex

Signature SIF VIT VELLORE  
DJ-DOPO-IH

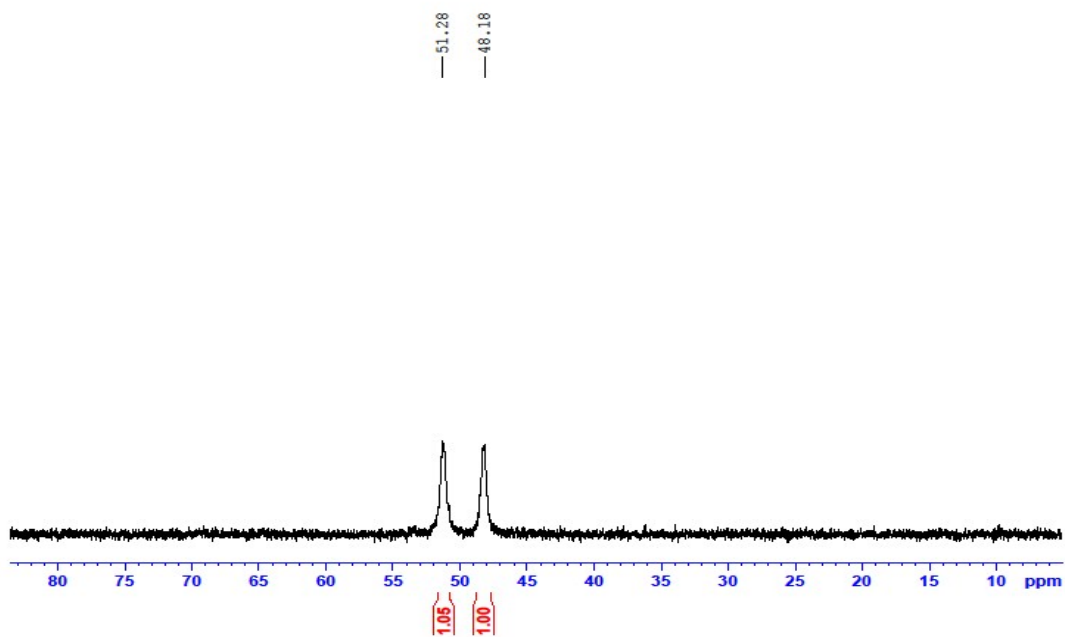

**Fig. S26**  $^{31}\text{P}$  NMR of Thorium-DOPO Complex

Signature SIF VIT VELLORE  
DJ-DOPO-IN

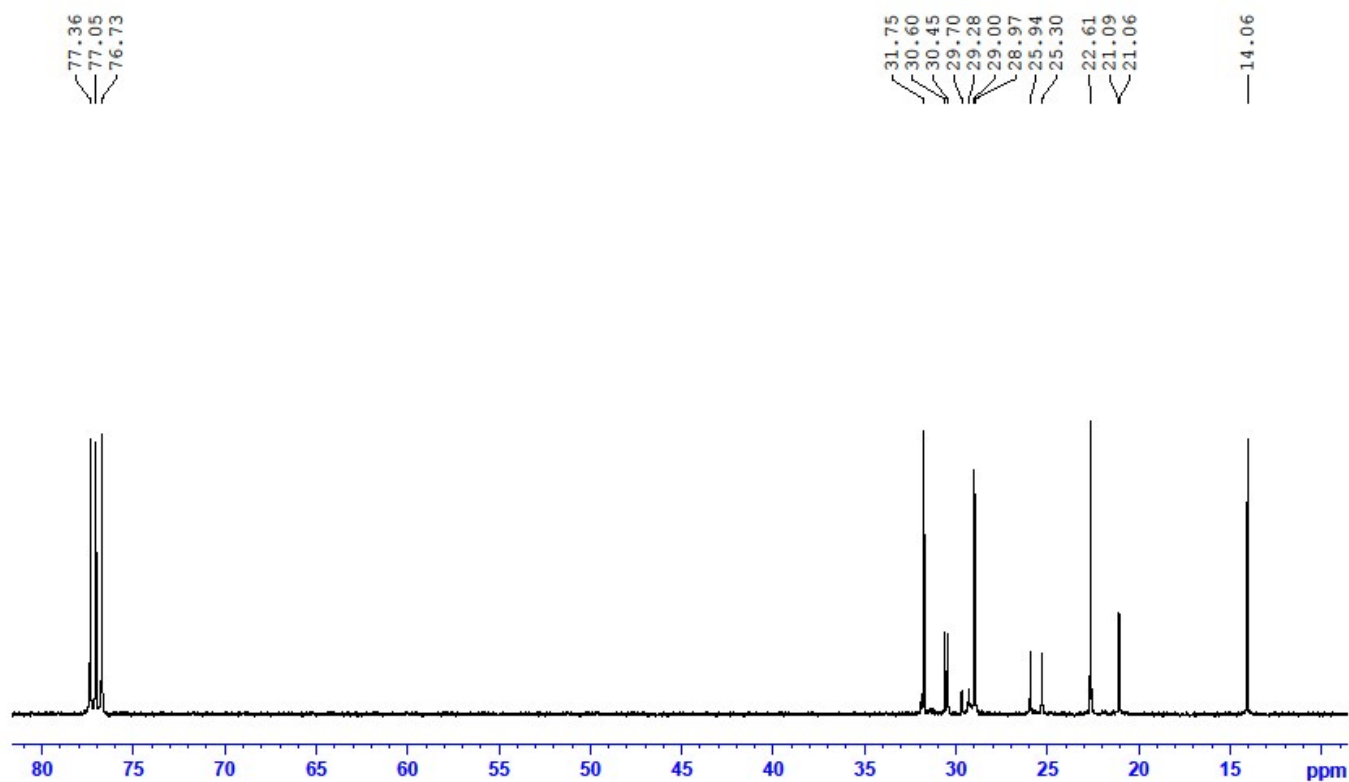

Fig. S27  $^{13}\text{C}$ -NMR of Thorium-DOPO complex

RK-G-DOPO-LA

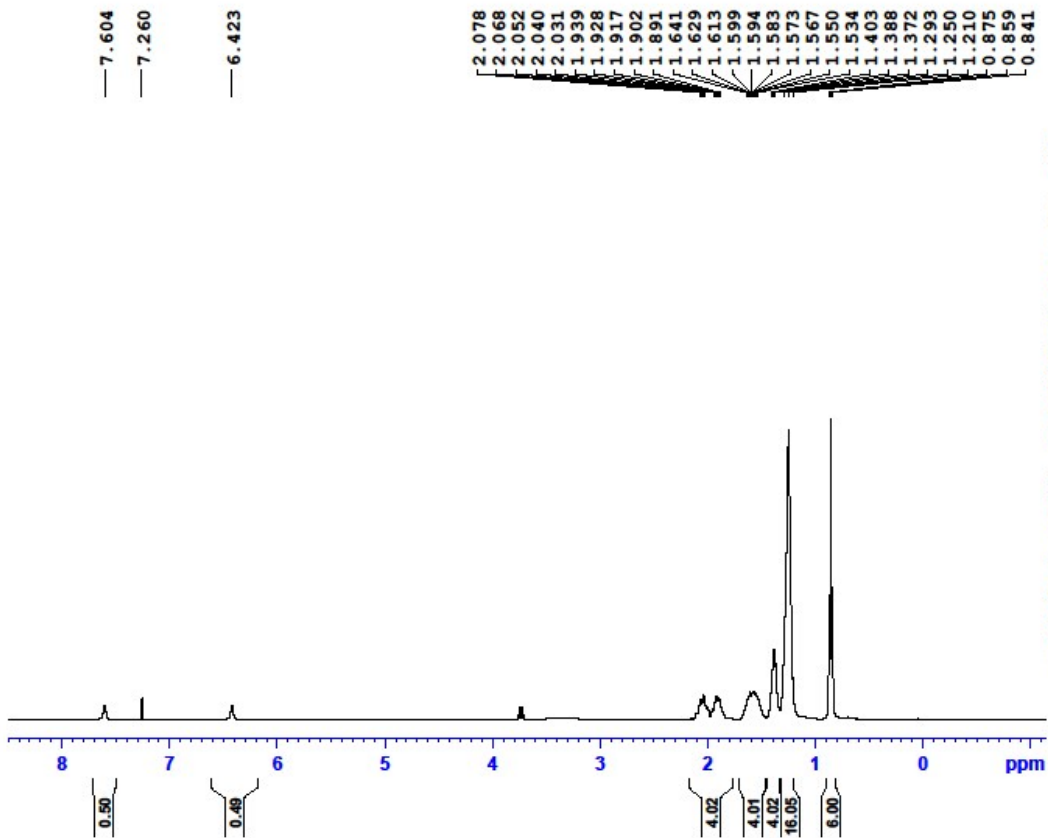

Fig. S28 <sup>1</sup>H-NMR of Lanthanum-DOPO complex



Signature SIF VIT VELLORE  
DJ-LA-C

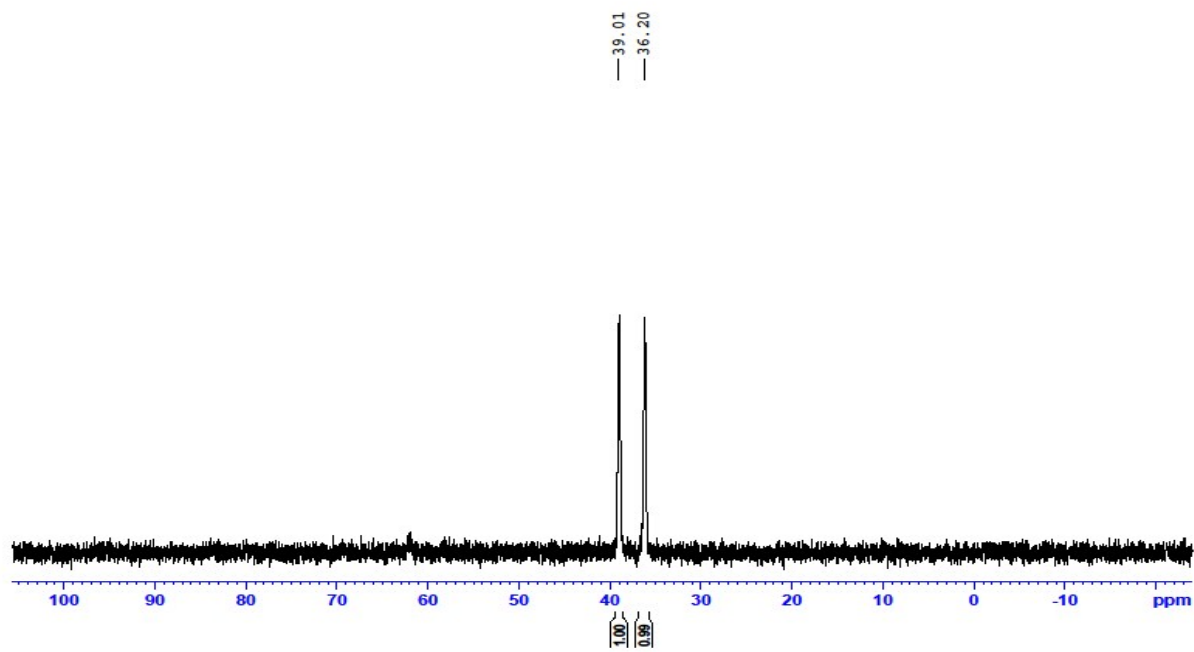

**Fig. S29**  $^{31}\text{P}$  NMR of Lanthanum-DOPO Complex

RK-G-DOPO-LA

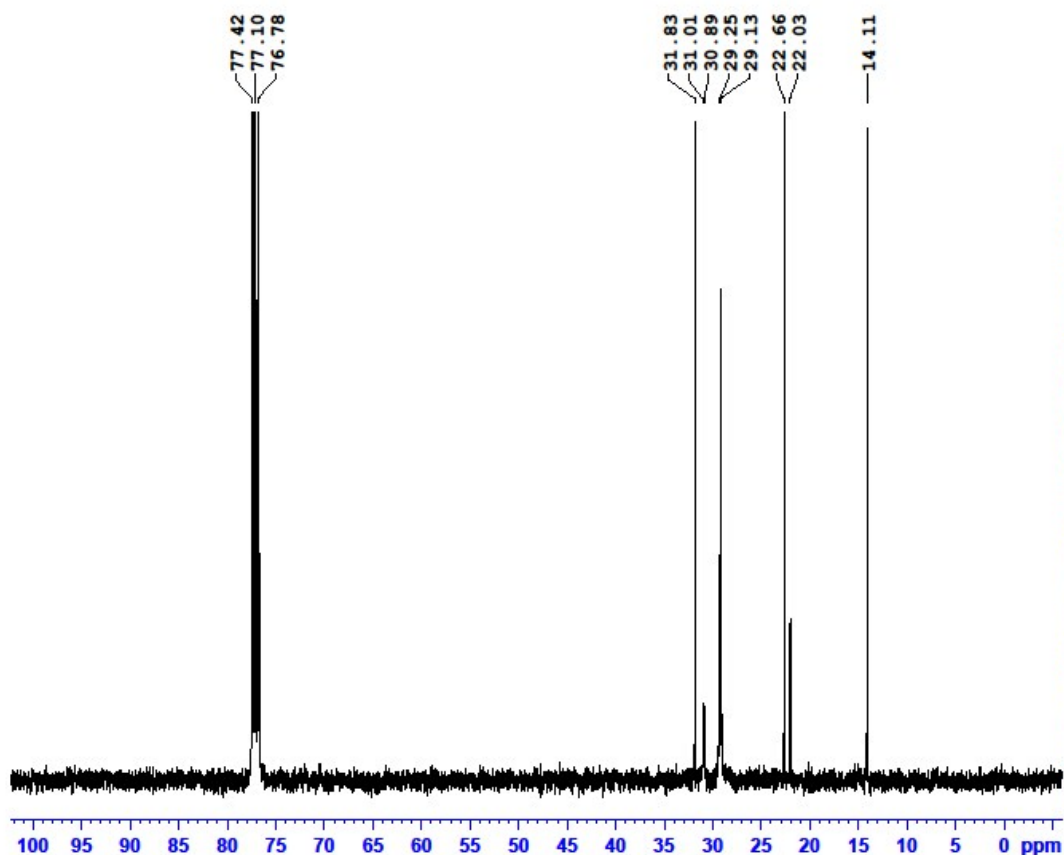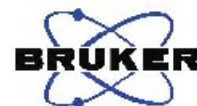

```
Current Data Parameters
NAME LRA40215
EXPNO 187
PROCNO 1

F2 - Acquisition Parameters
Date_ 20150303
Time 15.55
INSTRUM spect
PROBHD 5 mm PABBO BB/
PULPROG zgpg30
TD 65536
SOLVENT CDCl3
NS 512
DS 4
SWH 24038.461 Hz
FIDRES 0.266798 Hz
AQ 1.3631488 sec
RG 199.6
DW 20.800 usec
DE 6.50 usec
TE 302.8 K
DL 2.00000000 sec
D11 0.03000000 sec
TDO 1

===== CHANNEL f1 =====
NUC1 13C
P1 9.80 usec
PLW1 58.00000000 W
SFO1 100.6550182 MHz

===== CHANNEL f2 =====
CPDPRG2 waltz16
NUC2 1H
PCPD2 90.00 usec
PLW2 14.00000000 W
PLW12 0.35097000 W
PLW13 0.28428999 W
SFO2 400.2596010 MHz

F2 - Processing parameters
SI 32768
SF 100.6449540 MHz
WDW EM
SSB 0
LB 1.00 Hz
GB 0
PC 1.40
```

Fig. S30  $^{13}\text{C}$ -NMR of Lanthanum-DOPO complex

DDPO

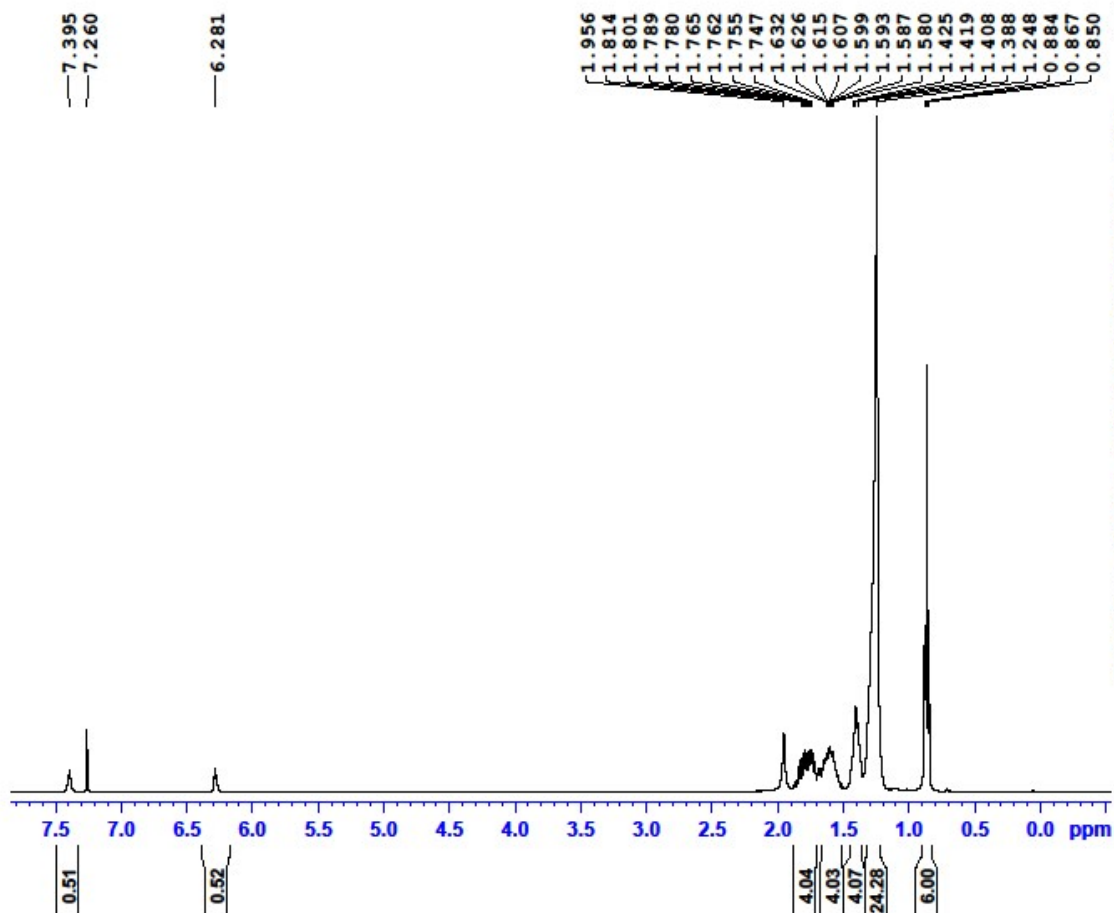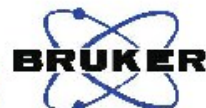

Current Data Parameters  
NAME Desktop  
EXPNO 43  
PROCNO 1

F2 - Acquisition Parameters  
Date\_ 20150528  
Time 17.08  
INSTRUM spect  
PROBHD 5 mm PABBO BB/  
PULPROG zg30  
TD 65536  
SOLVENT CDCl3  
NS 16  
DS 2  
SWH 8223.685 Hz  
FIDRES 0.125482 Hz  
AQ 3.9845889 sec  
RG 71.13  
DW 60.800 usec  
DE 6.50 usec  
TE 297.1 K  
D1 1.00000000 sec  
TDO 1

==== CHANNEL f1 =====  
NUC1 1H  
P1 14.25 usec  
PLN1 14.00000000 W  
SFO1 400.2604718 MHz

F2 - Processing parameters  
SI 65536  
SF 400.2580116 MHz  
WDW EM  
SSB 0  
LB 0.30 Hz  
GB 0  
PC 1.00

Fig. S31 <sup>1</sup>H-NMR of Di-*n*-decyl phosphine oxide(DDPO)

DDPO

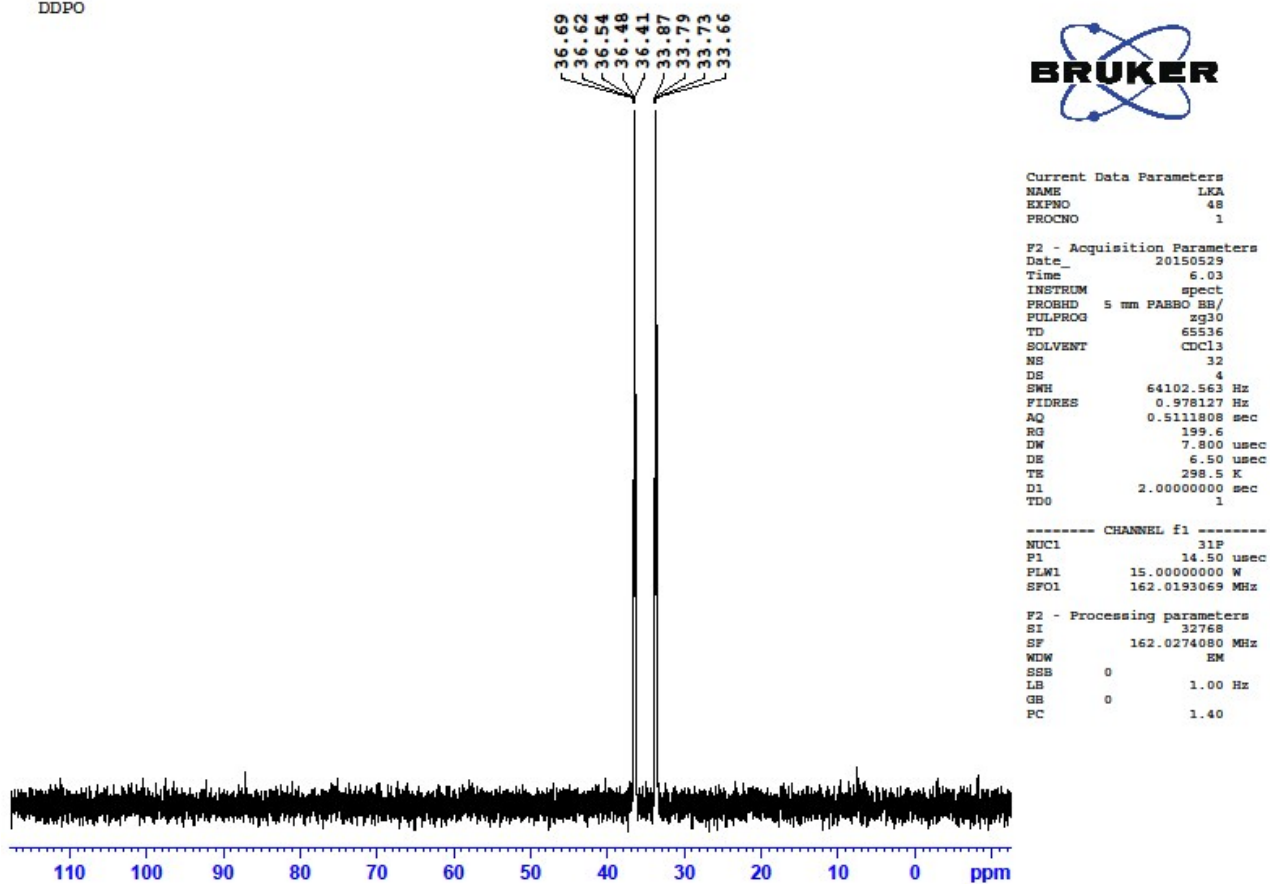

Fig. S32  $^{31}\text{P}$ -NMR of Di-*n*-decyl phosphine oxide(DDPO)

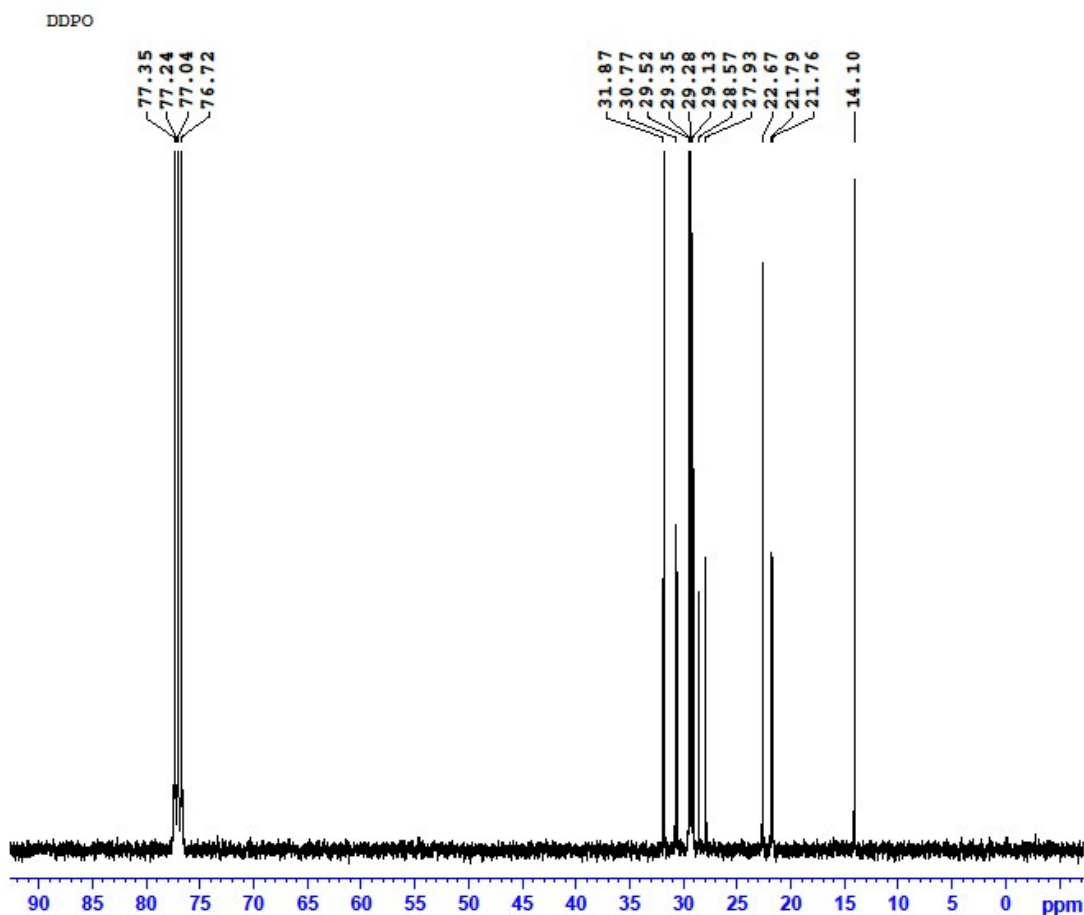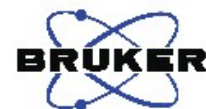

Current Data Parameters  
NAME LKA  
EXPNO 47  
PROCNO 1

F2 - Acquisition Parameters  
Date\_ 20150529  
Time 6.01  
INSTRUM spect  
PROBHD 5 mm PABBO BB/  
PULPROG zgpg30  
TD 65536  
SOLVENT CDCl3  
NS 512  
DS 4  
SWH 24038.461 Hz  
FIDRES 0.366798 Hz  
AQ 1.3631488 sec  
RG 199.6  
DW 20.800 usec  
DE 6.50 usec  
TE 299.2 K  
D1 2.00000000 sec  
D11 0.03000000 sec  
TD0 1

----- CHANNEL f1 -----  
NUC1 13C  
P1 9.80 usec  
PLW1 58.00000000 W  
SFO1 100.6250182 MHz

----- CHANNEL f2 -----  
CFDPRG[2] waltz16  
NUC2 1H  
PCPD2 90.00 usec  
PLW2 14.00000000 W  
PLW12 0.35097000 W  
PLW13 0.28428999 W  
SFO2 400.2596010 MHz

F2 - Processing parameters  
SI 32768  
SF 100.6449540 MHz  
WDW EM  
SBB 0  
LB 1.00 Hz  
GB 0  
PC 1.40

Fig. S33  $^{13}\text{C}$ -NMR of Di-*n*-decyl phosphine oxide(DDPO)

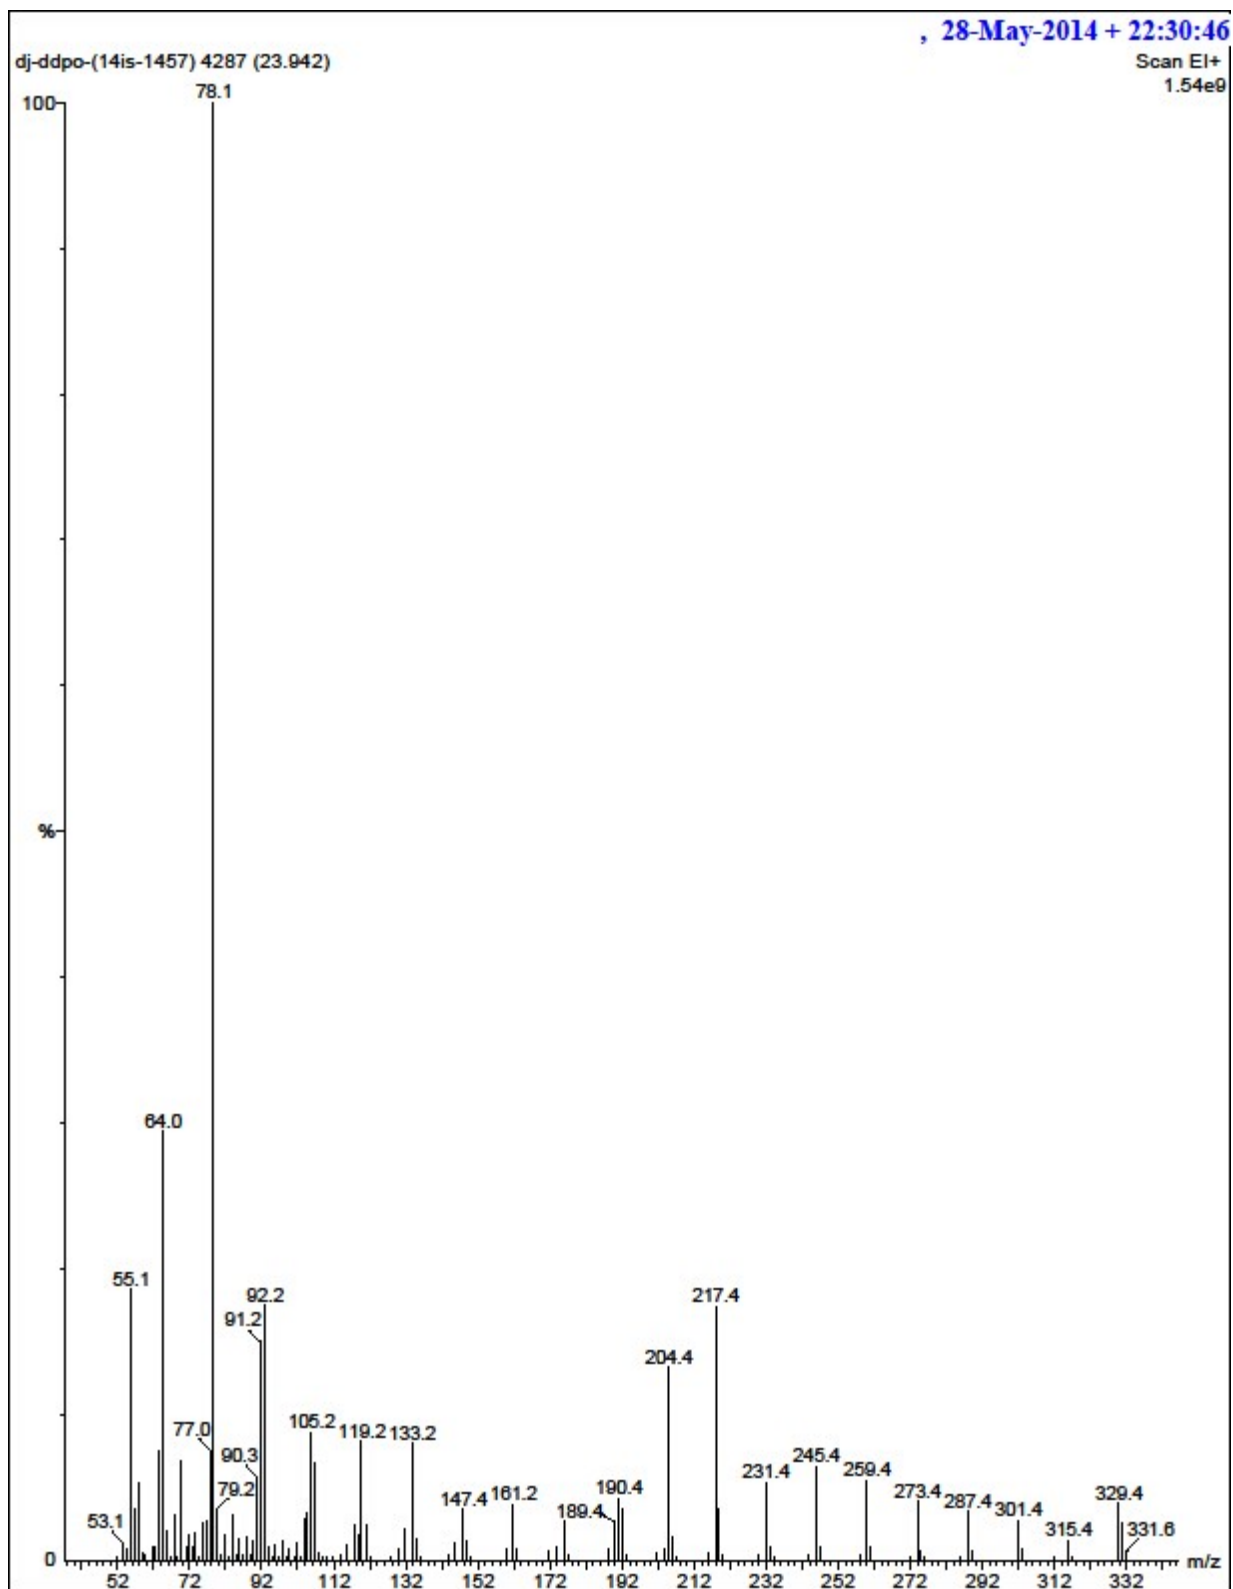

Fig. S34 EI mass spectra of Di-*n*-decyl phosphine oxide(DDPO)

Signature SIF VIT VELLORE  
DJ-TH-DD

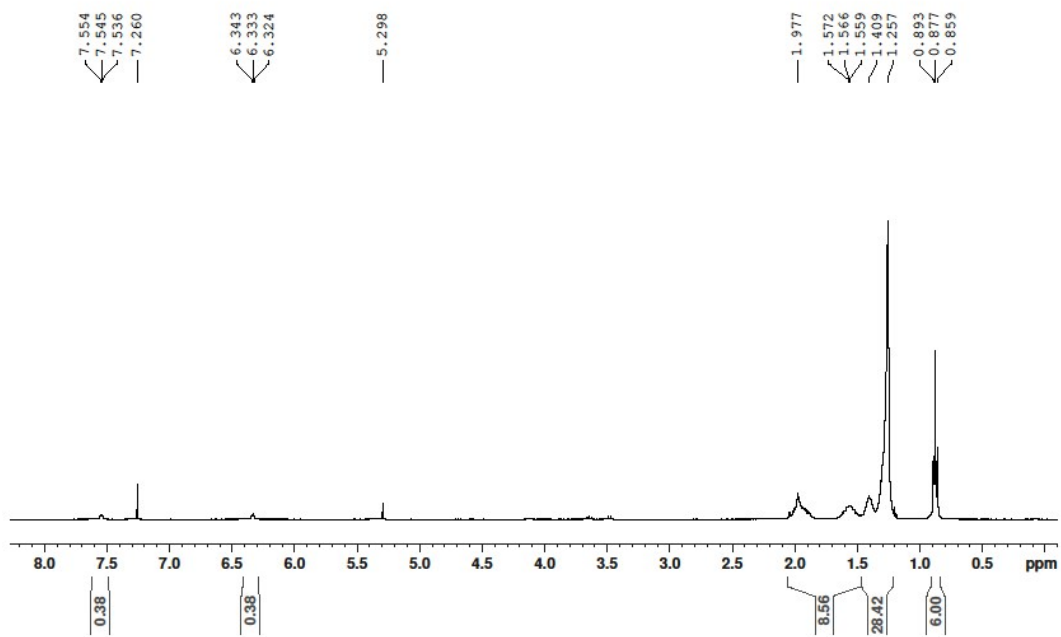

Fig. S35  $^1\text{H}$  NMR of Thorium-DDPO complex

Signature SIF VIT VELLORE  
DJ-TH-DD

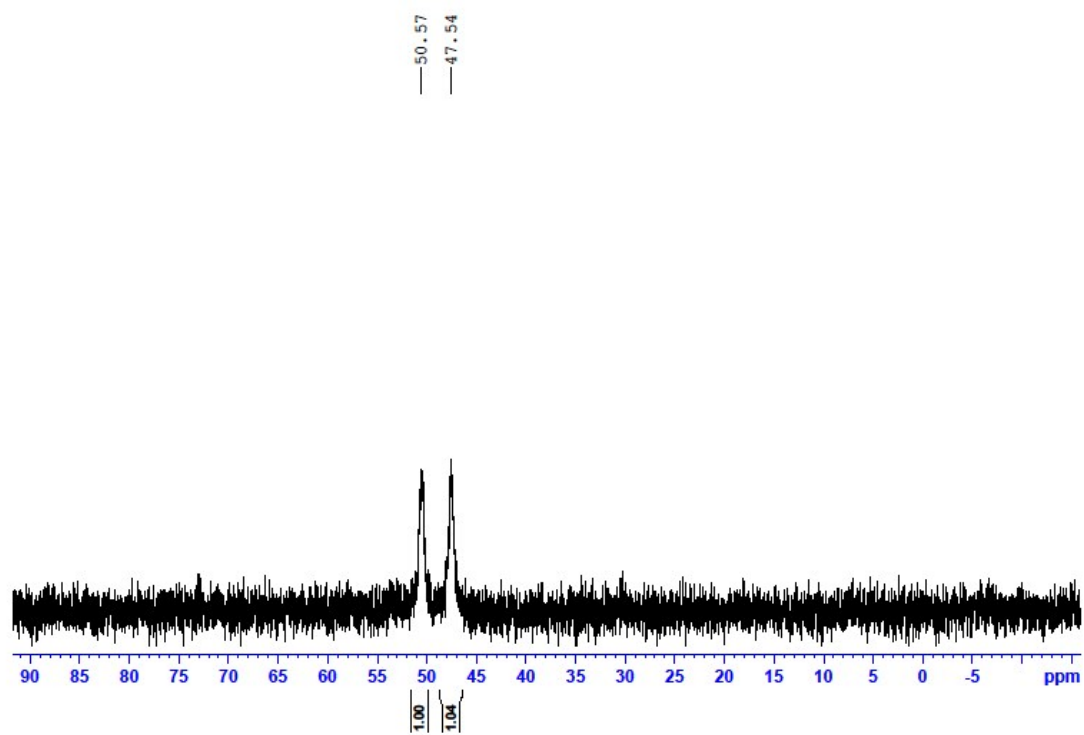

**Fig. S36**  $^{31}\text{P}$ NMR of Thorium-DDPO complex



Signature SIF VIT VELLORE  
DJ-IH-DD

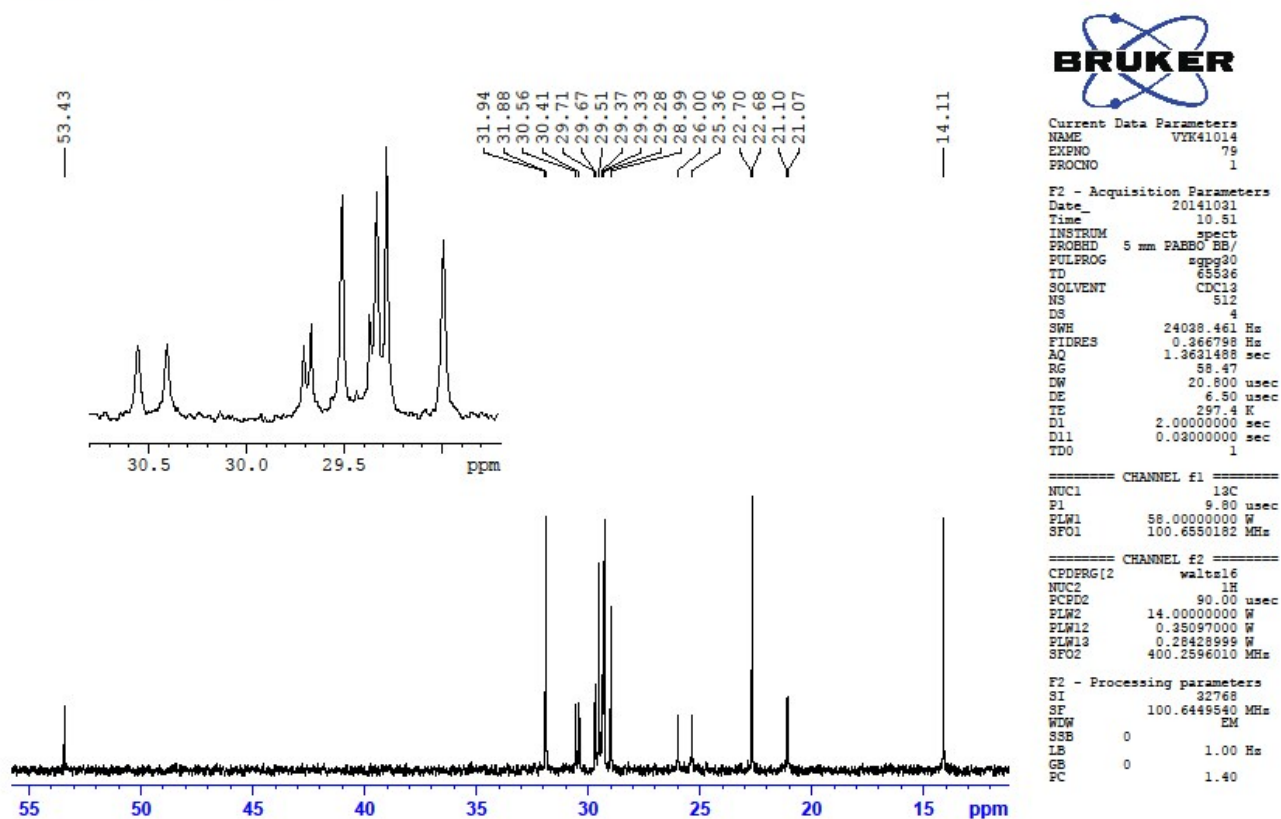

Fig. S37  $^{13}\text{C}$ -NMR of Thorium-DDPO complex

Signature SIF VIT VELLORE  
DJ-LA-DD

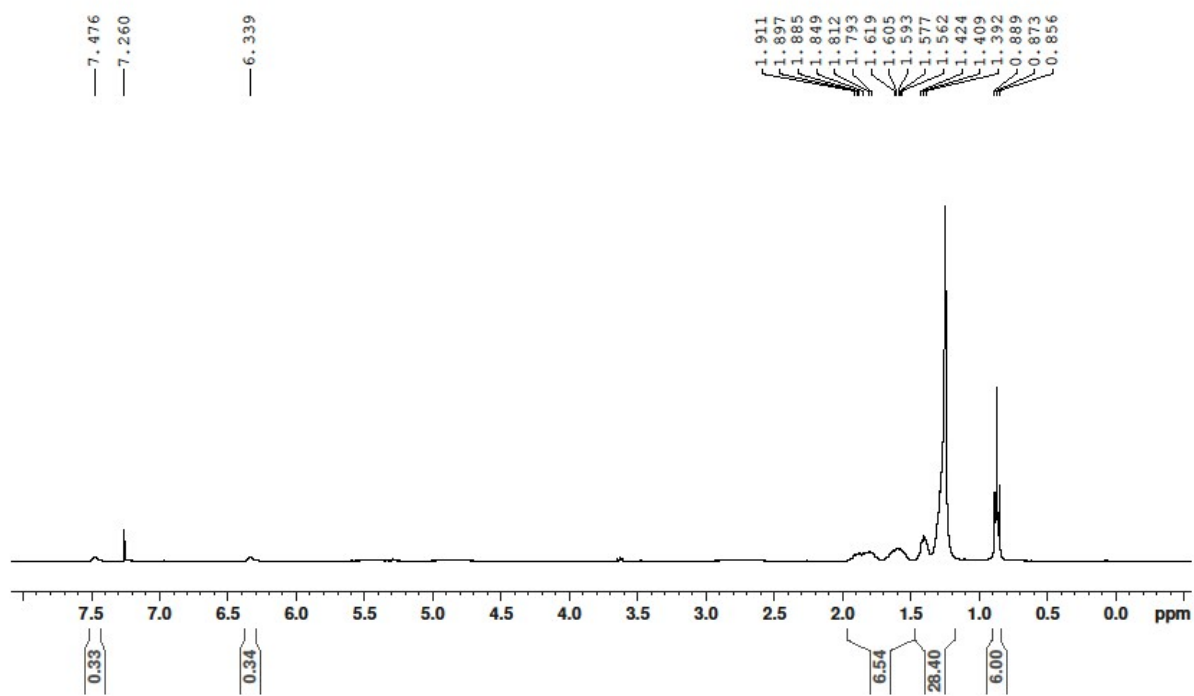

**Fig. S38**  $^1\text{H}$  NMR of Lanthanum-DDPO complex

DDPO-LA

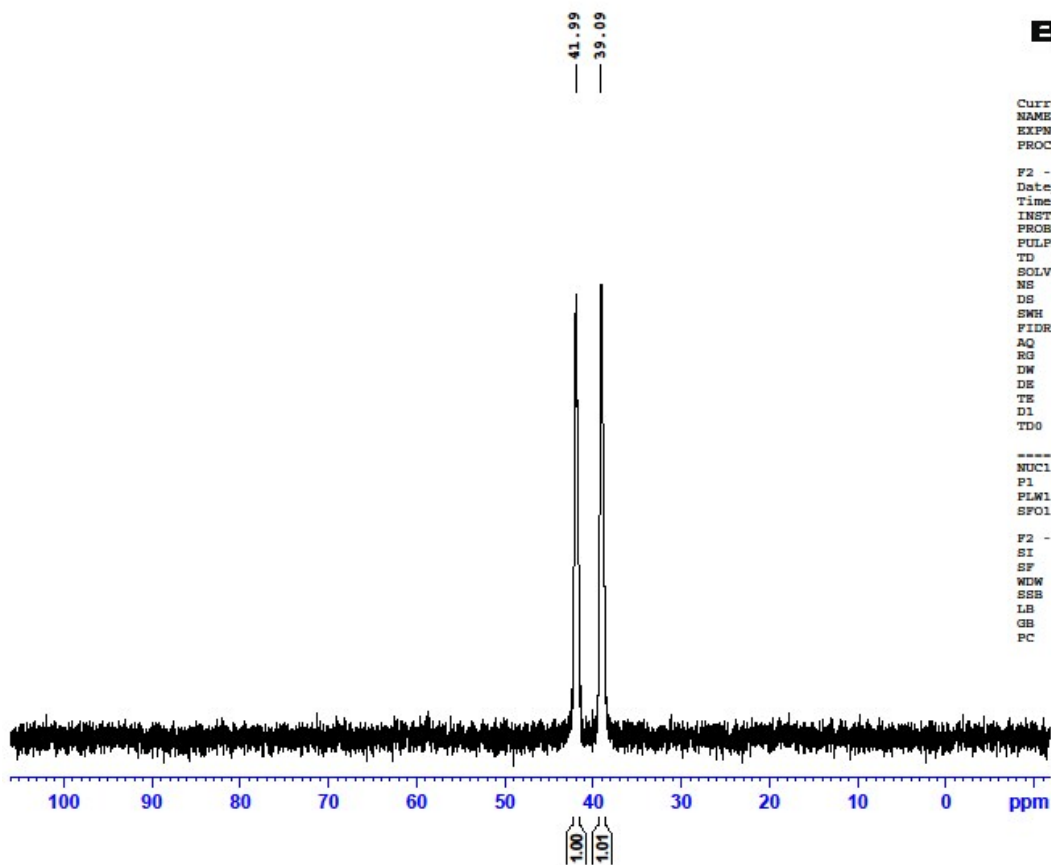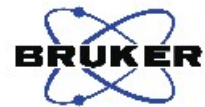

```
Current Data Parameters
NAME          LKA
EXPNO         50
PROCNO        1

F2 - Acquisition Parameters
Date_         20150529
Time          6.38
INSTRUM       spect
PROBHD        5 mm PABBO BB/
PULPROG       zg30
TD            65536
SOLVENT       CDCl3
NS            32
DS            4
SWH           64102.563 Hz
FIDRES        0.978127 Hz
AQ            0.5111808 sec
RG            199.6
DW            7.800 usec
DE            6.50 usec
TE            298.5 K
D1            2.00000000 sec
TD0           1

----- CHANNEL f1 -----
NUC1          31P
P1            14.50 usec
PLM1          15.00000000 W
SFO1          162.0193069 MHz

F2 - Processing parameters
SI            32768
SF            162.0274080 MHz
WDW           EM
SSB           0
LB            1.00 Hz
GB            0
PC            1.40
```

Fig. S39  $^{31}\text{P}$  NMR of Lanthanum-DDPO complex

Signature SIF VIT VELLORE  
DJ-LA-DD

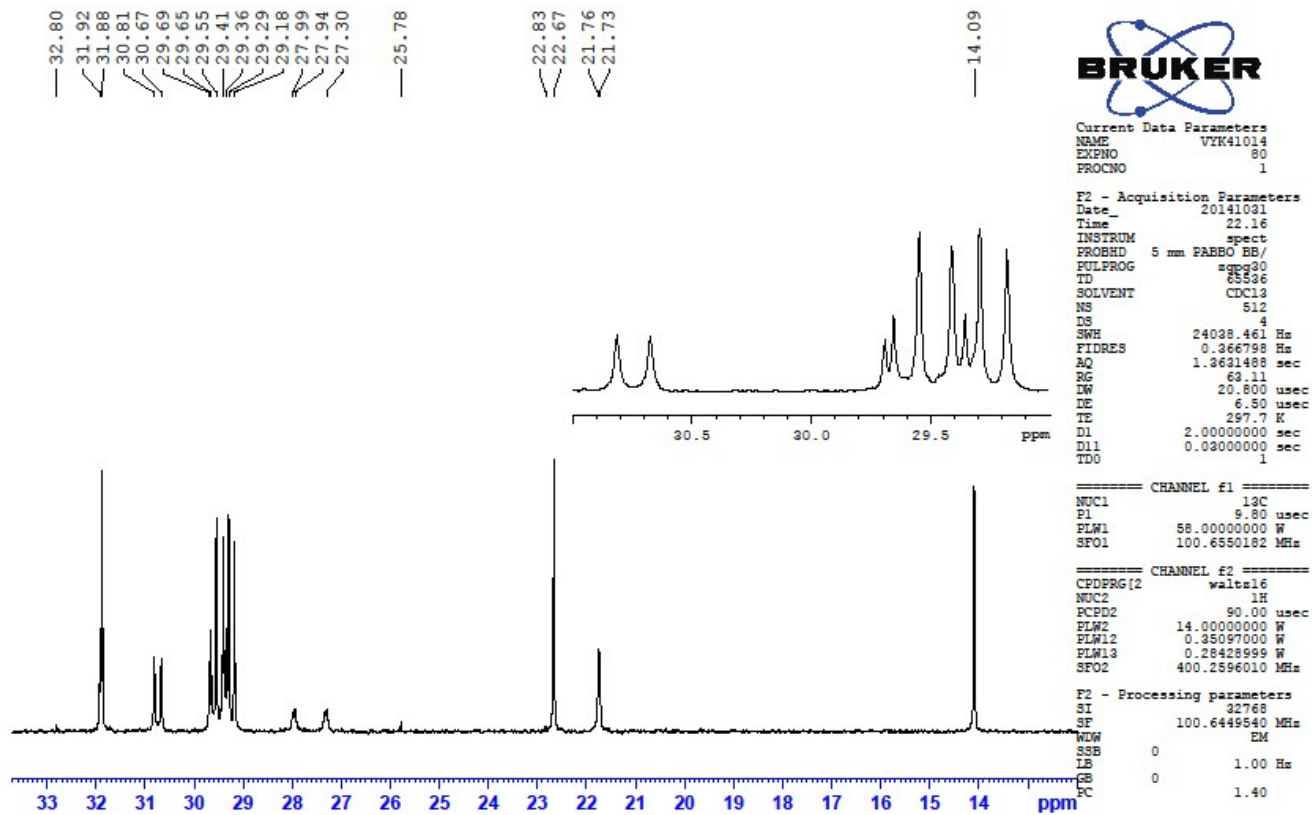

Fig. S40  $^{13}\text{C}$ -NMR of Lanthanum-DDPO complex

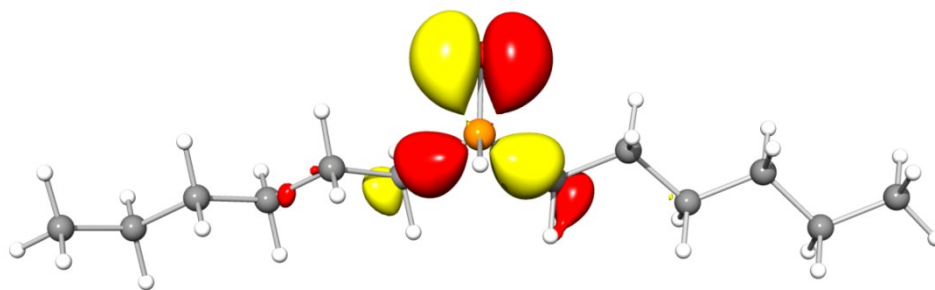

(a)

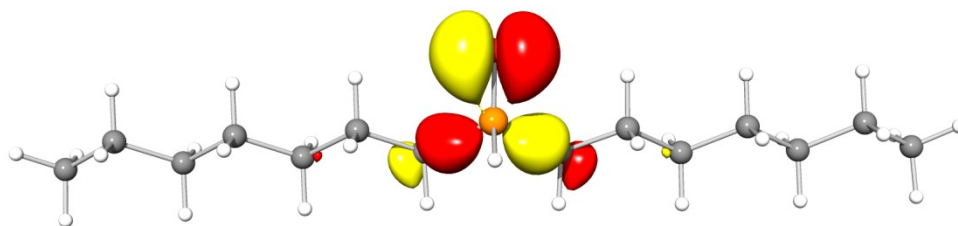

(b)

**Fig.S41** Shape of highest occupied molecular orbital (HOMO) of di-hexyl (a) and di-heptyl(b) phosphine oxides at B3LYP/def2-TZVP level.

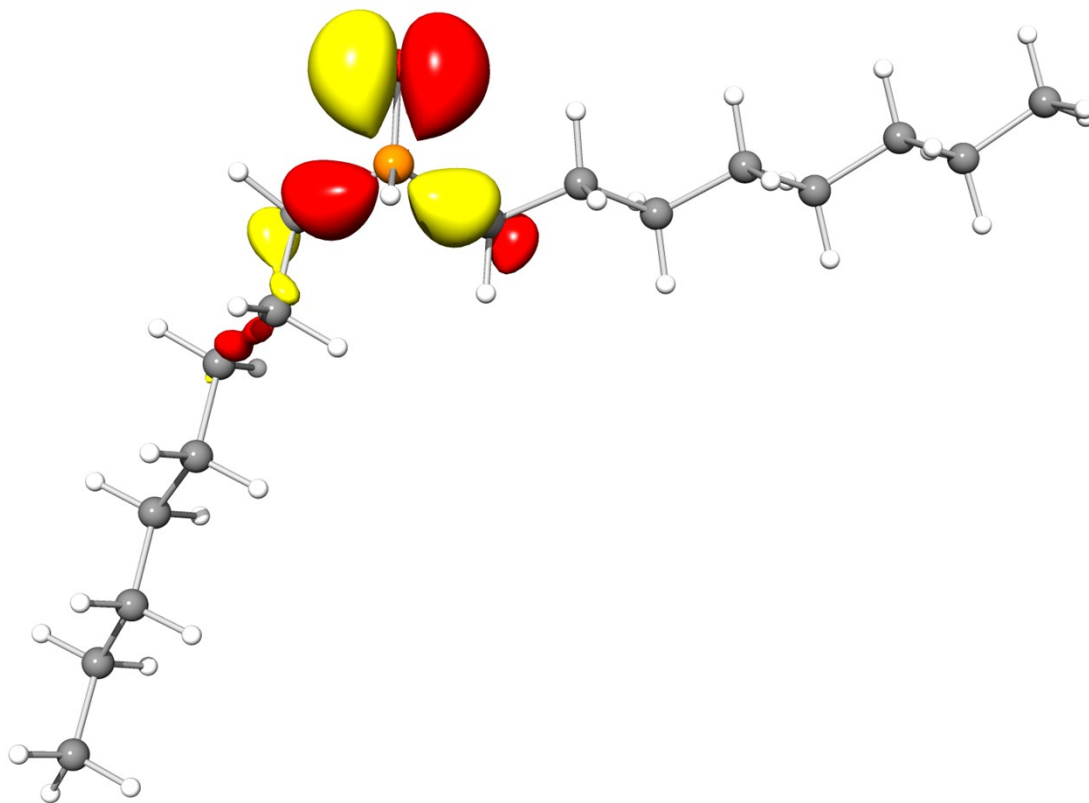

(a)

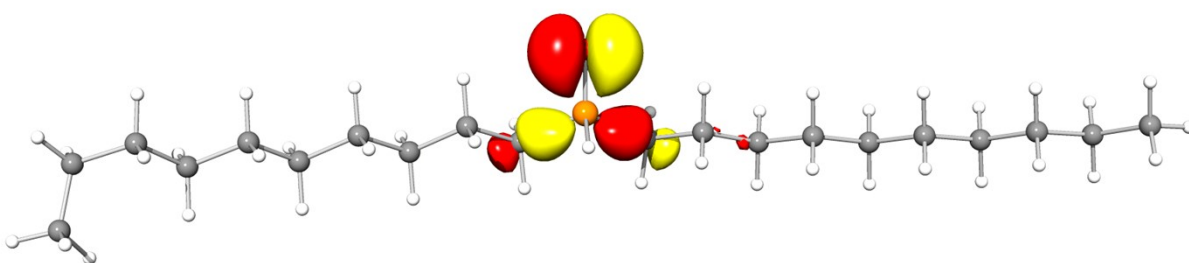

(b)

**Fig.S42** Shape of highest occupied molecular orbital (HOMO) of di-octyl(a) and di-decyl(b) phosphine oxides at B3LYP/def2-TZVP level

## COORDINATES OF OPTIMIZED GEOMETRIES

### 1. DHePO

|   |                   |                   |                   |
|---|-------------------|-------------------|-------------------|
| C | 0.85466779164257  | 2.03663831112894  | -1.95530667196291 |
| C | 0.61169481680235  | 2.71646536585383  | -0.60488793597144 |
| C | -0.41042938982595 | 3.84972871938785  | -0.68342987513490 |
| C | -0.73836990438247 | 4.46127501274380  | 0.67769967622789  |
| C | -1.74508374315715 | 5.60801410957609  | 0.61270709525244  |
| C | -2.09449956015756 | 6.17912992705041  | 1.98696397270765  |
| P | 2.13584633795667  | 0.74352713600435  | -1.91224209857824 |
| O | 3.53371421591322  | 1.22341500995243  | -1.78266314512603 |
| C | 1.77784386299888  | -0.31913603697694 | -3.34449173119676 |
| C | 2.79369091644896  | -1.44473790645466 | -3.56163994553624 |
| C | 2.24323814877480  | -2.53365288960958 | -4.48266564967193 |
| C | 3.27239444104940  | -3.58364156567576 | -4.89510065548761 |
| C | 2.65783865685373  | -4.73259094054047 | -5.69271419623450 |
| C | 3.68537033434038  | -5.74149111614215 | -6.19977902404708 |
| H | 1.18463818038350  | 2.76448928178087  | -2.70313719190847 |
| H | -0.07191169142891 | 1.58655890011907  | -2.32758841556171 |
| H | 0.77621697035231  | -0.73275198024522 | -3.17973462021271 |
| H | 1.71743737802659  | 0.31483766256410  | -4.23412273185959 |
| H | 3.70937342084787  | -1.01873393715721 | -3.97762862075080 |
| H | 3.07839913692290  | -1.89167581827657 | -2.60330890332290 |
| H | 1.82614425220170  | -2.07013990006808 | -5.38438521060873 |
| H | 1.40199822329978  | -3.02694694139022 | -3.98205055365459 |
| H | 4.05679388088825  | -3.10400456681866 | -5.49098205912953 |
| H | 3.76916510309261  | -3.98596913839208 | -4.00441885646778 |
| H | 2.10128901953987  | -4.32093745214329 | -6.54162918371536 |
| H | 1.92061298562217  | -5.24654544669285 | -5.06614247165730 |
| H | 1.69931138584973  | -0.07549169955184 | -0.83632315166982 |
| H | 0.26093696076174  | 1.96855975055921  | 0.11399013589328  |
| H | 1.55757942546134  | 3.10364144355896  | -0.21537833313511 |
| H | -0.03107395608136 | 4.62794404159277  | -1.35482527303662 |
| H | -1.33213432466023 | 3.47086894565985  | -1.14109868378729 |
| H | -1.13129434836398 | 3.67883737467933  | 1.33723617753352  |
| H | 0.18491855422352  | 4.82161557032763  | 1.14583041325179  |
| H | -1.34363602845813 | 6.40227598701178  | -0.02535852086808 |
| H | -2.65782252700871 | 5.25248450761550  | 0.12183864913176  |
| H | 3.20527207163533  | -6.54663042768649 | -6.76030800951190 |
| H | 4.41246071512595  | -5.26105652462508 | -6.85911647533792 |
| H | 4.23860769385354  | -6.19409882660223 | -5.37240511818511 |

|   |                   |                  |                  |
|---|-------------------|------------------|------------------|
| H | -2.81724373840407 | 6.99374569742864 | 1.91219451075523 |
| H | -2.53051478230961 | 5.41114758924565 | 2.63070247510181 |
| H | -1.20639930603153 | 6.57185645990837 | 2.48811596617361 |

## 2. DHpPO

|   |                   |                   |                   |
|---|-------------------|-------------------|-------------------|
| C | 0.47187010053135  | 1.51329087976897  | -1.43679085814918 |
| P | 1.99031728983123  | 0.55783906738324  | -1.74705162430064 |
| C | 1.44771754499175  | -0.77822975654778 | -2.85463609550084 |
| C | 2.59361297816286  | -1.66827707066401 | -3.33760616964658 |
| C | 2.11771499686769  | -2.74905596451174 | -4.30588402392338 |
| C | 3.25311148853057  | -3.59507546377203 | -4.87612919179399 |
| C | 2.76886686475017  | -4.66056664381667 | -5.85595294046528 |
| C | 3.89459326088012  | -5.48698676584245 | -6.47455453175641 |
| C | 0.66202996416965  | 2.75221020507689  | -0.56141626220843 |
| C | -0.64991632770118 | 3.51032585475572  | -0.34868066134308 |
| C | -0.50465702825505 | 4.77877371580907  | 0.48705573888060  |
| C | -1.82574858037945 | 5.52127378926655  | 0.68842418819716  |
| C | -1.69460784973629 | 6.80029029397797  | 1.51157023960361  |
| O | 3.16972541774003  | 1.32798225690863  | -2.21383486226888 |
| H | 0.07842977822160  | 1.80694458135574  | -2.41557884135912 |
| H | -0.25934322781666 | 0.82942741119277  | -0.99066161206373 |
| H | 0.68228296280899  | -1.36448597588081 | -2.33473163752347 |
| H | 0.95963355115890  | -0.29945984557329 | -3.70966729050795 |
| H | 3.34698570572017  | -1.04158022857636 | -3.82007575964943 |
| H | 3.08783048813287  | -2.13652240925165 | -2.47957402103683 |
| H | 1.57445632902375  | -2.27567468714043 | -5.13177101083030 |
| H | 1.39526919278704  | -3.39890731333184 | -3.79843856543020 |
| H | 3.97120306411541  | -2.93923802540149 | -5.38089655097919 |
| H | 3.80035185591601  | -4.07398951580509 | -4.05623692157482 |
| H | 2.19831891012727  | -4.17810876462709 | -6.65834035432705 |
| H | 2.06690948012501  | -5.32965241375980 | -5.34433487328788 |
| H | 2.19841705006078  | -0.11533157725686 | -0.51370864538840 |
| H | 1.07821329243223  | 2.45917403001059  | 0.40843105372249  |
| H | 1.40181761834356  | 3.40587960630779  | -1.02969992157874 |
| H | -1.07425830226216 | 3.77336173610251  | -1.32473996255514 |
| H | -1.37711076685070 | 2.84444549683027  | 0.13028642191232  |
| H | -0.07974030764127 | 4.52056184682449  | 1.46396818701333  |
| H | 0.21753551262257  | 5.44710327186881  | 0.00546714882017  |
| H | -2.25568292093313 | 5.76927698415934  | -0.28939090417501 |
| H | -2.54476317618808 | 4.85267228103293  | 1.17626681030614  |
| C | 3.37999946392603  | -6.53207814670122 | -7.46221390881322 |
| H | 4.59553295171980  | -4.81543346686104 | -6.98158931393343 |



|   |                   |                   |                   |
|---|-------------------|-------------------|-------------------|
| H | 4.46350871323975  | -5.97955316640549 | -5.67877084458125 |
| C | -3.02562593086179 | 7.52157265354724  | 1.71821018012025  |
| H | -1.25632935250927 | 6.55431737860997  | 2.48478873442275  |
| H | -0.98580460149064 | 7.47350718073293  | 1.01849730044349  |
| H | 4.19515807315558  | -7.10251347028648 | -7.91246680396815 |
| H | 2.71036089817842  | -7.23892570668051 | -6.96514790094639 |
| H | 2.81806180570363  | -6.05818360551515 | -8.27140689613996 |
| H | -2.90170435633112 | 8.42778445217605  | 2.31404033423087  |
| H | -3.47025020908872 | 7.81149767666812  | 0.76266705549655  |
| H | -3.74304320922925 | 6.88004612714275  | 2.23619189633665  |

### 3. DOPO

|   |                   |                   |                   |
|---|-------------------|-------------------|-------------------|
| C | 2.56285461637794  | 3.30170160750105  | -2.58206741039652 |
| C | 1.88033286621900  | 3.34966905427483  | -1.20906956885377 |
| C | 0.62143855599068  | 4.21587597459707  | -1.17982898121201 |
| C | -0.01763586618914 | 4.27749764613380  | 0.20557119002695  |
| C | -1.37980630793064 | 4.96640003876968  | 0.24518680787646  |
| C | -1.97328523558771 | 5.01187754486110  | 1.65076199747059  |
| C | -3.38352142750700 | 5.59399088545675  | 1.73103488139443  |
| P | 3.65603423400590  | 1.86470654849071  | -2.82491441840128 |
| O | 4.66118559209093  | 1.99277954194296  | -3.90956146483622 |
| C | 2.54286610101147  | 0.43731318408071  | -3.01671942678124 |
| C | 3.30183932349401  | -0.85919503696990 | -3.31524712295233 |
| C | 2.39948588348882  | -1.96983493829606 | -3.85079846606276 |
| C | 3.17301668065579  | -3.20646687356081 | -4.30202579015922 |
| C | 2.29246792354995  | -4.27280760240175 | -4.95028547609154 |
| C | 3.08318149577950  | -5.44444400682925 | -5.52650189142326 |
| C | 2.21281702210388  | -6.47489342682842 | -6.24231771636691 |
| H | 3.17081988467543  | 4.19216282902069  | -2.75705811918126 |
| H | 1.82214398774073  | 3.26785916725251  | -3.38691242878953 |
| H | 1.90532714315327  | 0.34015299432878  | -2.13372950589446 |
| H | 1.89028826180882  | 0.68482385135588  | -3.86036909107000 |
| H | 4.07723026821454  | -0.64162669329379 | -4.05325782938145 |
| H | 3.82151033123424  | -1.20074521557973 | -2.41417573414115 |
| H | 1.82955450040240  | -1.57981468989368 | -4.70173646560831 |
| H | 1.65929667570029  | -2.25011448986343 | -3.09319804422150 |
| H | 3.94147790145465  | -2.89825908253092 | -5.01901532038463 |
| H | 3.71043404873960  | -3.63864936016359 | -3.45022332129431 |
| H | 1.70606345685039  | -3.81114291530762 | -5.75332006739943 |
| H | 1.56485989749439  | -4.64476574212457 | -4.22028739255975 |
| H | 3.82906816107302  | -5.05856973934925 | -6.23065888462277 |

|   |                   |                   |                   |
|---|-------------------|-------------------|-------------------|
| H | 3.64882357587693  | -5.93643149923066 | -4.72650076145236 |
| H | 4.20905647077398  | 1.67495258740531  | -1.53117278998630 |
| H | 1.60233271284481  | 2.34068422555050  | -0.88564387014037 |
| H | 2.59565632201559  | 3.71518580905101  | -0.46673634956771 |
| H | 0.86314107731442  | 5.22699667289957  | -1.52534643321003 |
| H | -0.10161535784451 | 3.81105883839715  | -1.89670223390766 |
| H | -0.13016364790438 | 3.25738644831492  | 0.59151883041313  |
| H | 0.66605086948445  | 4.78519846539869  | 0.89496019950770  |
| H | -1.29187234382476 | 5.98494146100518  | -0.14950220272817 |
| H | -2.06907030285194 | 4.43930575846973  | -0.42415250978076 |
| H | -1.98564292147788 | 3.99741278043906  | 2.06658041619268  |
| H | -1.30885892538686 | 5.59256308453068  | 2.30075369681443  |
| C | -3.90598041224949 | 5.65076737221874  | 3.16396407600292  |
| H | -3.39509274015973 | 6.59870749274078  | 1.29522616420081  |
| H | -4.05906137065787 | 4.99113836887931  | 1.11555646098022  |
| H | -4.91633738891396 | 6.06195406221670  | 3.21206464754321  |
| H | -3.92681856829843 | 4.65413679970726  | 3.61164375282989  |
| H | -3.26487720295867 | 6.27721610554652  | 3.78888915969661  |
| C | 3.02356088979060  | -7.59518197120309 | -6.88717382816472 |
| H | 1.49561146814508  | -6.90099761262979 | -5.53239924245860 |
| H | 1.61689158856645  | -5.96713895137629 | -7.00845116574880 |
| H | 2.37992210728603  | -8.30592932478025 | -7.41018283035639 |
| H | 3.73440337816667  | -7.19162877548232 | -7.61248916555549 |
| H | 3.59578133326819  | -8.14892936434248 | -6.13787821250703 |

#### 4. DDPO

|   |                   |                   |                   |
|---|-------------------|-------------------|-------------------|
| C | -0.49573668592531 | 1.77127604802039  | -2.05476378068504 |
| P | -0.31704160046769 | 2.76792453830038  | -0.54193685069698 |
| C | -1.77847661525858 | 3.82526854277557  | -0.30564530096600 |
| C | -1.43446718960145 | 4.97207867433226  | 0.65420111445306  |
| C | -2.63734383373871 | 5.78804662303932  | 1.12383099597027  |
| C | -2.22271166355812 | 6.92786144068487  | 2.05232671154832  |
| C | -3.38694437028298 | 7.73724752716035  | 2.61882076897040  |
| C | -2.92685628972024 | 8.85512600404861  | 3.55217575406762  |
| C | -4.06621589387689 | 9.66433401966529  | 4.16748651102595  |
| C | -3.57607006728231 | 10.75844033595389 | 5.11314768220569  |
| C | -4.69692381931281 | 11.56845742793875 | 5.76174360504463  |
| C | 0.82375950846474  | 1.03732605381166  | -2.32740514300051 |
| C | 0.86533182951920  | 0.24118909072689  | -3.63152130718856 |
| C | 2.23325985681346  | -0.41375761283807 | -3.82544442522001 |
| C | 2.41425999665139  | -1.18111699474010 | -5.13417837632221 |

|   |                   |                   |                   |
|---|-------------------|-------------------|-------------------|
| C | 3.80539523480216  | -1.80593478335137 | -5.23724727042000 |
| C | 4.06356748428343  | -2.59115590245508 | -6.52251106376091 |
| C | 5.44858180403976  | -3.24038447345460 | -6.53552675720529 |
| C | 5.75131174532991  | -4.10454174877288 | -7.76293698907243 |
| C | 5.92458610162835  | -3.32001931654242 | -9.06401006813364 |
| O | 0.06047119526324  | 2.00247434021518  | 0.67282359200009  |
| H | -1.32050714071460 | 1.06566061424628  | -1.92290848801439 |
| H | -0.75969172036867 | 2.44126150194802  | -2.88029966104601 |
| H | -2.14074114338194 | 4.20540490928589  | -1.26588718982731 |
| H | -2.55885932554406 | 3.18679915080579  | 0.11956738976545  |
| H | -0.92349328595724 | 4.55837446044842  | 1.52793133528718  |
| H | -0.71702190586474 | 5.63915441832230  | 0.16484738617884  |
| H | -3.33957358513229 | 5.12894603401788  | 1.64582583649920  |
| H | -3.17619895890231 | 6.19335367310760  | 0.25978057722154  |
| H | -1.63939043818337 | 6.51415260022161  | 2.88248035700865  |
| H | -1.54554007768167 | 7.59995602219931  | 1.51256119469980  |
| H | -4.06373306216713 | 7.06809261209963  | 3.16232443082448  |
| H | -3.97309183733538 | 8.16515397936569  | 1.79748678302144  |
| H | -2.32141227047020 | 8.42182652427987  | 4.35649688638261  |
| H | -2.26064368260980 | 9.53030047291675  | 3.00260197448729  |
| H | 0.65669646109787  | 3.71135936605299  | -0.96735947020550 |
| H | 1.63754294251944  | 1.77093224069623  | -2.34458429637220 |
| H | 1.03984712515926  | 0.37646492942257  | -1.48449893578994 |
| H | 0.08170875404400  | -0.52449286197947 | -3.63236193674565 |
| H | 0.64528566699584  | 0.90539844005761  | -4.47533408045951 |
| H | 3.00455316604170  | 0.36238799762994  | -3.75812237383444 |
| H | 2.42742742459143  | -1.09121132859543 | -2.98611786139726 |
| H | 1.65391277273984  | -1.96640592759872 | -5.21620092087991 |
| H | 2.24362747213180  | -0.50648791910177 | -5.98124198819434 |
| H | 4.55831804795106  | -1.01524371011296 | -5.13769941325287 |
| H | 3.96291347953928  | -2.47031759000590 | -4.37961031434277 |
| H | 3.30141761885463  | -3.37172651577461 | -6.63422280208627 |
| H | 3.94314202777521  | -1.92513024626383 | -7.38307029403976 |
| H | -4.66808231424340 | 10.11481258762523 | 3.36987360617269  |
| H | -4.73676561561780 | 8.99000679592428  | 4.71267827466806  |
| H | 6.21283257147429  | -2.45929972661591 | -6.44464535993919 |
| H | 5.54881341024312  | -3.86024901932552 | -5.63819226421422 |
| H | 6.66500160750355  | -4.67511756479080 | -7.57230888955153 |
| H | 4.95359153608602  | -4.84502465194072 | -7.88608511981984 |
| H | 6.20620253369342  | -3.98166201258736 | -9.88579413944365 |
| H | 5.00721523481435  | -2.80329496222865 | -9.35370991406927 |
| H | 6.70855528410323  | -2.56475927343780 | -8.96429340204741 |
| H | -2.96257528975744 | 10.30404180862601 | 5.89997756573621  |
| H | -2.91141424142113 | 11.43702974709129 | 4.56544637727339  |
| C | -4.17144813118066 | 12.63966317230298 | 6.71546696075114  |
| H | -5.30582887426464 | 12.03673648386557 | 4.98100718718802  |

|   |                   |                   |                  |
|---|-------------------|-------------------|------------------|
| H | -5.36367589950210 | 10.88955169592798 | 6.30420560821783 |
| H | -4.98263633530955 | 13.20072858917549 | 7.18454527288259 |
| H | -3.57255908392016 | 12.19020849090500 | 7.51191094706189 |
| H | -3.53357954099962 | 13.35248547777236 | 6.18603071953047 |

## 5. DHePO-TS (*unimolecular*)

|   |                   |                   |                   |
|---|-------------------|-------------------|-------------------|
| O | 1.48411215469885  | 0.00271607722195  | -0.60184991130590 |
| H | 2.11054395176783  | 0.00303850620448  | 0.65842237092383  |
| C | -0.48795941972522 | 1.44229576751278  | 0.75494957031903  |
| P | 0.63797668582871  | 0.00067220565329  | 0.74919056872601  |
| C | -0.48973726517723 | -1.43941043424593 | 0.75067444216379  |
| C | 0.25015160124194  | -2.77170115376546 | 0.62100581693722  |
| C | -0.66401955793903 | -3.93085444388931 | 0.22844510029543  |
| C | 0.09258842440554  | -5.23573207800366 | -0.01668852730590 |
| C | -0.79034067912565 | -6.35954717136762 | -0.55708491687613 |
| C | -0.01707056757252 | -7.63641311036384 | -0.88338613796660 |
| C | 0.25394114092899  | 2.77300935287323  | 0.61975117804486  |
| C | -0.65861048420677 | 3.93309952771058  | 0.22628444468369  |
| C | 0.10100632337711  | 5.23473185366334  | -0.02659202048135 |
| C | -0.78027625765337 | 6.35949974610022  | -0.56760497488650 |
| C | -0.00422919474710 | 7.63317759094949  | -0.89955422709170 |
| H | -1.13630401628197 | 1.28653697333328  | -0.11780637683744 |
| H | -1.12398247423559 | 1.41304039360624  | 1.64417868675925  |
| H | -1.13076979554791 | -1.40782375785682 | 1.63622061225058  |
| H | -1.13266132361318 | -1.28312819662516 | -0.12601247708457 |
| H | 1.02696989983474  | -2.66283172761128 | -0.13972914915826 |
| H | 0.76417581670468  | -2.99904878175944 | 1.55982048023098  |
| H | -1.20588928113014 | -3.65835696047300 | -0.68380665811857 |
| H | -1.42689207986240 | -4.08391324497641 | 0.99973157478946  |
| H | 0.90307228084054  | -5.04614959910891 | -0.72869871770795 |
| H | 0.57682738845003  | -5.56195155463520 | 0.91104773037798  |
| H | -1.30487550456728 | -6.00540956274064 | -1.45661515592547 |
| H | -1.57680451886485 | -6.58354367155494 | 0.17118572870264  |
| H | 0.77107084670424  | 3.00176296867493  | 1.55652109280326  |
| H | 1.02845118698504  | 2.66056707782961  | -0.14279574951145 |
| H | -1.20415999529940 | 3.65860610465634  | -0.68318720814508 |
| H | -1.41849730194779 | 4.09125561241089  | 0.99947232594709  |
| H | 0.59029645961057  | 5.56267192272832  | 0.89786782448598  |
| H | 0.90774387518277  | 5.03982510116465  | -0.74142456995611 |
| H | -1.29785535438149 | 6.00435282856738  | -1.46499975381368 |
| H | -1.56432982700025 | 6.58758455884662  | 0.16198366733571  |

|   |                   |                   |                   |
|---|-------------------|-------------------|-------------------|
| H | -0.67672003434949 | -8.41073322591931 | -1.27985461411101 |
| H | 0.75776453517999  | -7.44731214054526 | -1.62999071617518 |
| H | 0.47700421747859  | -8.03741874142753 | 0.00572642821017  |
| H | -0.66238387128210 | 8.40768092557704  | -1.29815567673927 |
| H | 0.49204333272901  | 8.03628857483619  | -0.01262210857462 |
| H | 0.76910768256156  | 7.43917288674887  | -1.64645599621422 |

## 6. DHePO-TS (*unimolecular*)

|   |                   |                   |                   |
|---|-------------------|-------------------|-------------------|
| P | 0.51924387757703  | -1.67596379126344 | -0.01435055842234 |
| H | 1.08813035646634  | -0.27076857671437 | -0.01680467059507 |
| P | -0.55854513211341 | 1.47610000814530  | -0.02591508147175 |
| H | -1.19870569408578 | -0.37908216967471 | -0.02068634513289 |
| O | -1.04586672785371 | -1.45828383218971 | -0.01574932072161 |
| C | -0.95580733697580 | 2.56337748277823  | 1.40804349719915  |
| C | -0.64836144805534 | 1.84439828990671  | 2.72366367463231  |
| C | -1.21808561852277 | 2.51907863135977  | 3.96898629499817  |
| C | -0.79838538877058 | 1.83960893689420  | 5.27073913175569  |
| C | -1.42166094139271 | 2.46076173095916  | 6.51854967313237  |
| C | -0.93049679504848 | 1.84432390740430  | 7.82527964893827  |
| C | -0.95420927082170 | 2.56131111416687  | -1.46176538917100 |
| C | -0.64431178480924 | 1.84240675923448  | -2.77690582350272 |
| C | -1.21644576810217 | 2.51511651917851  | -4.02221486205320 |
| C | -0.79735557139957 | 1.83606756790277  | -5.32439578274558 |
| C | -1.42310456626159 | 2.45684149923924  | -6.57119875548744 |
| C | -0.93408596671592 | 1.84086090308851  | -7.87892589392934 |
| O | 0.98768788294434  | 1.22823118541312  | -0.02432206473436 |
| C | 0.98284239690961  | -2.62713163494640 | 1.45650957419642  |
| C | 0.63058783413842  | -1.86089516547620 | 2.73788599877369  |
| C | 1.24707898061998  | -2.46901594931410 | 3.99455581014394  |
| C | 0.79951523046560  | -1.78318712259599 | 5.28313722484507  |
| C | 1.43857270091402  | -2.37792900670084 | 6.53599647238742  |
| C | 0.93969442620855  | -1.75722046694624 | 7.83744611558478  |
| C | 0.98543579916023  | -2.63040552573903 | -1.48236192513042 |
| C | 0.63079191667847  | -1.86845261347274 | -2.76559646707236 |
| C | 1.24647571797786  | -2.47860149897044 | -4.02163588560190 |
| C | 0.79741677953577  | -1.79442974075768 | -5.31059676820129 |
| C | 1.43548517390637  | -2.38984557742781 | -6.56362214886212 |
| C | 0.93571828894527  | -1.76935450722248 | -7.86484725744970 |
| H | -2.01911623428408 | 2.82191297709500  | 1.34799146152945  |
| H | -0.38270982974202 | 3.49347197650554  | 1.33227782078776  |
| H | -1.04327671475414 | 0.82343272975007  | 2.67250660612012  |

|                     |                   |                   |
|---------------------|-------------------|-------------------|
| H 0.43695732526833  | 1.74868342325975  | 2.81742546072933  |
| H -0.90446377908543 | 3.56875125201514  | 3.99215486781926  |
| H -2.31230364240618 | 2.52148486910764  | 3.90267735751412  |
| H -1.06749050007193 | 0.77830158798797  | 5.22803193602900  |
| H 0.29399656852397  | 1.87818747281071  | 5.35535857092063  |
| H -1.20951509376423 | 3.53549806345516  | 6.52433800197973  |
| H -2.51060457288667 | 2.35576575493155  | 6.46014017799198  |
| H -1.40271358151869 | 2.31871231258546  | 8.68819088429674  |
| H -1.15630721738371 | 0.77606985726351  | 7.86892653301092  |
| H 0.15117792919165  | 1.96093480187623  | 7.93313848534347  |
| H -0.38249995168767 | 3.49223436986067  | -1.38565011349105 |
| H -2.01791991807993 | 2.81860364930733  | -1.40328215452554 |
| H 0.44129089727104  | 1.75011185965867  | -2.87068928678007 |
| H -1.03612830115308 | 0.82026000838798  | -2.72539896496085 |
| H -2.31059409407341 | 2.51554086977616  | -3.95462652093465 |
| H -0.90474352751672 | 3.56535166572386  | -4.04626028817986 |
| H 0.29486884358416  | 1.87602081637314  | -5.41043655499981 |
| H -1.06519853288481 | 0.77444634561178  | -5.28153633767170 |
| H -2.51189116313897 | 2.35130760956172  | -6.51084087250948 |
| H -1.21153657979909 | 3.53169174845965  | -6.57727843832959 |
| H -1.40826343132701 | 2.31510213114180  | -8.74084293611465 |
| H 0.14730676634225  | 1.95818513102240  | -7.98885357029829 |
| H -1.15939009606709 | 0.77247375231595  | -7.92230573019301 |
| H 2.06192836052675  | -2.80473716755228 | 1.39198659652295  |
| H 0.48819306325406  | -3.60248527164665 | 1.42813997732046  |
| H 0.96271308766408  | -0.82335515593732 | 2.64303658266804  |
| H -0.45717772230192 | -1.82973822907375 | 2.83415917744382  |
| H 0.99134431326976  | -3.53365157640656 | 4.04545799079849  |
| H 2.33891565979678  | -2.40969996889333 | 3.91912142245127  |
| H 1.03664554751499  | -0.71586747870632 | 5.22867041705474  |
| H -0.29102240016978 | -1.85419272179320 | 5.36453497591831  |
| H 1.24625500991068  | -3.45649400478937 | 6.55364724982038  |
| H 2.52518722742994  | -2.25280676905566 | 6.47321908262525  |
| H 1.41771214174876  | -2.22159784994843 | 8.70243104518955  |
| H 1.15349321522220  | -0.68668681553169 | 7.87408094878800  |
| H -0.14038060660196 | -1.88537940125199 | 7.94599649276203  |
| H 2.06503431556082  | -2.80470643478017 | -1.41750417116622 |
| H 0.49347260987316  | -3.60704325492429 | -1.45126622374974 |
| H -0.45714636793148 | -1.83936574657893 | -2.86071816506281 |
| H 0.96143633595883  | -0.83014807062860 | -2.67386117446425 |
| H 2.33836957659623  | -2.41895103871495 | -3.94731731282864 |
| H 0.99078614227302  | -3.54333185674989 | -4.07077109501697 |
| H -0.29316071693654 | -1.86616188007793 | -5.39091349481056 |
| H 1.03401860644222  | -0.72691386143585 | -5.25733927078918 |
| H 2.52217314773002  | -2.26496274312944 | -6.50167559567975 |
| H 1.24285897062724  | -3.46836238104014 | -6.58081157890007 |

|   |                   |                   |                   |
|---|-------------------|-------------------|-------------------|
| H | 1.41307755934278  | -2.23388685938011 | -8.73011224339057 |
| H | -0.14444124996631 | -1.89750873599454 | -7.97260681567214 |
| H | 1.14958358099004  | -0.69883112778247 | -7.90180166551859 |

### 7. Th(NO<sub>3</sub>)<sub>2</sub>.2DHePO (PBE0/def2-TZVP-ECP)

|    |                   |                   |                   |
|----|-------------------|-------------------|-------------------|
| O  | 0.60502006267874  | 6.30446306838516  | 3.06994990814530  |
| N  | 1.28767626435406  | 6.41583404891114  | 2.09721596964084  |
| O  | 1.50960383878621  | 5.46026786037298  | 1.30120801427105  |
| Th | 2.88998686909698  | 6.75308031357211  | -0.38939547960937 |
| O  | 1.85810479966994  | 7.51460871660512  | 1.79103082350265  |
| O  | 5.13624535954291  | 6.27304023318934  | -1.41847517373390 |
| N  | 5.02206513523436  | 7.02951012411388  | -2.43502023716196 |
| O  | 5.86606456506744  | 7.08727260769776  | -3.28187861191116 |
| O  | 3.95019121169587  | 7.69518220667998  | -2.48890158411031 |
| O  | 0.36431279497960  | 7.03767718573121  | -0.63328874222942 |
| N  | 0.39711985081015  | 8.20850426534990  | -1.10360772083245 |
| O  | -0.58597277756546 | 8.84046635036938  | -1.35140937686326 |
| O  | 1.56899440713792  | 8.67381925812878  | -1.29004067655875 |
| O  | 3.79961371905059  | 4.40422687766464  | 0.10254595995150  |
| N  | 4.45796471724061  | 4.72092723632285  | 1.13540971495594  |
| O  | 5.11286908174644  | 3.93473962912403  | 1.75209519086168  |
| O  | 4.37142244755601  | 5.94263999416183  | 1.47030575331140  |
| O  | 2.16956813173238  | 5.30973211371393  | -2.09131103810646 |
| O  | 4.09508599822192  | 8.61753915275998  | 0.37707651727690  |
| P  | 4.37412207709048  | 9.56317766924671  | 1.52815300915155  |
| P  | 2.16549871804121  | 3.87504598331691  | -2.58546492411048 |
| H  | 1.30944353680932  | 3.77456947773671  | -3.70032789105257 |
| C  | 3.78404430581818  | 3.38278369513707  | -3.15889714156162 |
| C  | 1.51704309538137  | 2.75672122419027  | -1.34941211524308 |
| H  | 5.36097683236891  | 10.48755164036681 | 1.12630628856504  |
| C  | 2.94262935610476  | 10.53763961264514 | 1.99269349388965  |
| C  | 5.03488601538488  | 8.73143060774801  | 2.96593756308574  |
| H  | 5.06125221837760  | 9.46256964672488  | 3.78136506836325  |
| H  | 4.29609109111209  | 7.96760820459307  | 3.23015768958571  |
| C  | 6.39556920492070  | 8.07984537307851  | 2.73075875079255  |
| H  | 3.26831193223742  | 11.26086008833903 | 2.74722735286384  |
| C  | 2.28596318184124  | 11.19604608365149 | 0.78237317448917  |
| H  | 2.25047622799496  | 9.84102906220229  | 2.47816819115332  |
| C  | 6.72623033784652  | 7.08777777514602  | 3.83370733068083  |

|   |                   |                   |                   |
|---|-------------------|-------------------|-------------------|
| H | 6.38497948960971  | 7.55280659899407  | 1.77255123405896  |
| H | 7.17088568461915  | 8.85074364272050  | 2.67101068702454  |
| C | 8.09125613810274  | 6.44304102937725  | 3.67497154127493  |
| H | 6.67179300872349  | 7.59203816040558  | 4.80624860761438  |
| H | 5.95764070052594  | 6.30764087478353  | 3.84121564767773  |
| C | 8.39570552391586  | 5.44433739709428  | 4.77835028471378  |
| H | 8.14194374234446  | 5.93811628622637  | 2.70347672575741  |
| H | 8.86664946382005  | 7.21935376514293  | 3.66276191866670  |
| C | 9.77434377675392  | 4.81960876111483  | 4.65772603192672  |
| H | 8.30571543608214  | 5.94735124860642  | 5.74867751282453  |
| H | 7.63163370314663  | 4.66017409715616  | 4.77113936000080  |
| H | 9.97472914208469  | 4.13166153000658  | 5.48113048664514  |
| H | 9.87604422866336  | 4.25412622210247  | 3.72748317177217  |
| H | 10.55127194422854 | 5.58841750001568  | 4.66724877361225  |
| C | 0.87335987147853  | 11.67693676025233 | 1.06102128078772  |
| H | 2.90147431411190  | 12.03261721947035 | 0.43319231143785  |
| H | 2.25362513461887  | 10.47035726823345 | -0.03353331893703 |
| C | 0.22335225552354  | 12.23840370338340 | -0.19154167309858 |
| H | 0.27094570526701  | 10.84054578253745 | 1.43519559833296  |
| H | 0.87904327108838  | 12.43863934442622 | 1.85115930330289  |
| C | -1.18724103878056 | 12.75309654157006 | 0.03073444273131  |
| H | 0.84931716393568  | 13.04758604312241 | -0.58928142083337 |
| H | 0.20309778337328  | 11.45632414273195 | -0.95914530844780 |
| C | -1.80637111054071 | 13.28266127089575 | -1.25067336872885 |
| H | -1.80664472377445 | 11.94399720792389 | 0.43431215699109  |
| H | -1.17423264859687 | 13.54070078826321 | 0.79343894310815  |
| H | -2.80902779215854 | 13.68474430931197 | -1.08890670874215 |
| H | -1.18464471424262 | 14.07357046917340 | -1.67850836399667 |
| H | -1.87892963539369 | 12.48644082303483 | -1.99516573063497 |
| H | 1.50047246505537  | 1.74277315537964  | -1.76106819616419 |
| H | 2.25053001220485  | 2.77446091816626  | -0.53685630515045 |
| C | 0.14084550444581  | 3.21476918230666  | -0.87274890622999 |
| H | 3.78811891617419  | 2.30048387410244  | -3.32305390855963 |
| C | 4.20771353483420  | 4.14469936773184  | -4.41336820561337 |
| H | 4.46309910638468  | 3.59118905078132  | -2.32393740023741 |
| C | -0.28628916133457 | 2.55736575949801  | 0.42792774411072  |
| H | 0.14096600232316  | 4.29937905594026  | -0.72710935636462 |
| H | -0.60073900817925 | 3.02118406674352  | -1.65639518205859 |
| C | -1.62047374181109 | 3.08839700590449  | 0.91638130153877  |
| H | -0.33207880344941 | 1.46805266440717  | 0.30700244928411  |



|   |                   |                  |                   |
|---|-------------------|------------------|-------------------|
| H | 0.47688425116762  | 2.75664210691193 | 1.18839876966928  |
| C | -2.07441521946895 | 2.47336028587058 | 2.22897552489061  |
| H | -1.54524132988309 | 4.17640127877762 | 1.02916702970077  |
| H | -2.38601433337718 | 2.91966709956061 | 0.14758468440348  |
| C | -3.40703443367910 | 3.02361650040707 | 2.70532630671579  |
| H | -2.13822906905313 | 1.38542584716595 | 2.11587347336887  |
| H | -1.30588368769164 | 2.65362420093463 | 2.98887892761679  |
| H | -3.72005271674513 | 2.56739589775910 | 3.64685650367730  |
| H | -3.34519269678761 | 4.10432934187375 | 2.85228785054999  |
| H | -4.18779889359348 | 2.84071747345930 | 1.96184748668482  |
| C | 5.64417481267270  | 3.83719514892783 | -4.79857922872734 |
| H | 3.53837866114053  | 3.88237604861746 | -5.24157865727919 |
| H | 4.09406149708726  | 5.22220013130738 | -4.25811723540610 |
| C | 6.09110711607994  | 4.52246394598564 | -6.07843649021291 |
| H | 6.30557502066572  | 4.13751772590199 | -3.97750706184750 |
| H | 5.75710050804721  | 2.75152117813619 | -4.90827208151370 |
| C | 7.50477072002178  | 4.13789108590475 | -6.48120013065667 |
| H | 5.39783663318565  | 4.27088282825005 | -6.89173450393860 |
| H | 6.03366263534163  | 5.60934013723002 | -5.95067241292562 |
| C | 7.95940480964945  | 4.79395874975508 | -7.77367899560415 |
| H | 8.19033776650271  | 4.40847816119366 | -5.67032216312015 |
| H | 7.56222578414622  | 3.04802171710998 | -6.57736247571577 |
| H | 8.99610282763403  | 4.54272421327893 | -8.00896795675773 |
| H | 7.33197515855329  | 4.48504944528817 | -8.61455652946701 |
| H | 7.89190987273883  | 5.88142151957639 | -7.69758821545635 |
